# Supplementary material for: How do we assess resilience and grit among internal medicine residents at the Mayo Clinic? A longitudinal validity study including correlations with medical knowledge, professionalism and clinical performance
Source: PubMed Central journal article supplement — BMJ Open. 2020 Dec 15;10(12):e040699. doi: 10.1136/bmjopen-2020-040699 (PMC7745331; doi:10.1136/bmjopen-2020-040699), 2020-12-15
Supplement: bmjopen-2020-040699.draft_revisions.pdf [file bmjopen-2020-040699.draft_revisions.pdf]

# BMJ Open

BMJ Open is committed to open peer review. As part of this commitment we make the peer review history of every article we publish publicly available.

When an article is published we post the peer reviewers' comments and the authors' responses online. We also post the versions of the paper that were used during peer review. These are the versions that the peer review comments apply to.

The versions of the paper that follow are the versions that were submitted during the peer review process. They are not the versions of record or the final published versions. They should not be cited or distributed as the published version of this manuscript.

BMJ Open is an open access journal and the full, final, typeset and author-corrected version of record of the manuscript is available on our site with no access controls, subscription charges or pay-per-view fees (<http://bmjopen.bmj.com>).

If you have any questions on BMJ Open's open peer review process please email [info.bmjopen@bmj.com](mailto:info.bmjopen@bmj.com)

# BMJ Open

## Measurements of Resilience and Grit among Internal Medicine Residents: Validity and Correlations with Medical Knowledge, Professionalism, and Clinical Performance

|                               |                                                                                                                                                                                                                                                                                                                                                                                                                                                                                                                                                                                                                                                                                                                                                                                                                                                                                                                             |
|-------------------------------|-----------------------------------------------------------------------------------------------------------------------------------------------------------------------------------------------------------------------------------------------------------------------------------------------------------------------------------------------------------------------------------------------------------------------------------------------------------------------------------------------------------------------------------------------------------------------------------------------------------------------------------------------------------------------------------------------------------------------------------------------------------------------------------------------------------------------------------------------------------------------------------------------------------------------------|
| Journal:                      | <i>BMJ Open</i>                                                                                                                                                                                                                                                                                                                                                                                                                                                                                                                                                                                                                                                                                                                                                                                                                                                                                                             |
| Manuscript ID                 | bmjopen-2020-040699                                                                                                                                                                                                                                                                                                                                                                                                                                                                                                                                                                                                                                                                                                                                                                                                                                                                                                         |
| Article Type:                 | Original research                                                                                                                                                                                                                                                                                                                                                                                                                                                                                                                                                                                                                                                                                                                                                                                                                                                                                                           |
| Date Submitted by the Author: | 20-May-2020                                                                                                                                                                                                                                                                                                                                                                                                                                                                                                                                                                                                                                                                                                                                                                                                                                                                                                                 |
| Complete List of Authors:     | Alahdab, Fares; Mayo Clinic, Mayo Evidence-based Practice Center Halvorsen, Andrew; Mayo Clinic, Office of Educational Innovations, Internal Medicine Residency Program<br>Mandrekar, Jayawant ; Mayo Clinic, Division of Biomedical Statistics and Informatics, Department of Health Sciences Research<br>Vaa, Brianna; Mayo Clinic, Division of Community Internal Medicine<br>Montori, Victor; Mayo Clinic, Knowledge and Evaluation Research Unit West, Colin; Mayo Clinic, Division of General Internal Medicine, Department of Medicine; Mayo Clinic, Division of Biomedical Statistics and Informatics, Department of Health Sciences Research<br>Murad, M. Hassan; Mayo Clinic, Division of Preventive, Occupational, and Aerospace Medicine; Mayo Clinic, Mayo Evidence-Based Practice Center, Mayo Clinic<br>Beckman, Thomas; Mayo Clinic, Division of General Internal Medicine, Department of Internal Medicine |
| Keywords:                     | INTERNAL MEDICINE, MEDICAL EDUCATION & TRAINING, STATISTICS & RESEARCH METHODS                                                                                                                                                                                                                                                                                                                                                                                                                                                                                                                                                                                                                                                                                                                                                                                                                                              |
|                               |                                                                                                                                                                                                                                                                                                                                                                                                                                                                                                                                                                                                                                                                                                                                                                                                                                                                                                                             |

SCHOLARONE™  
Manuscripts

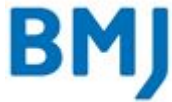

I, the Submitting Author has the right to grant and does grant on behalf of all authors of the Work (as defined in the below author licence), an exclusive licence and/or a non-exclusive licence for contributions from authors who are: i) UK Crown employees; ii) where BMJ has agreed a CC-BY licence shall apply, and/or iii) in accordance with the terms applicable for US Federal Government officers or employees acting as part of their official duties; on a worldwide, perpetual, irrevocable, royalty-free basis to BMJ Publishing Group Ltd ("BMJ") its licensees and where the relevant Journal is co-owned by BMJ to the co-owners of the Journal, to publish the Work in this journal and any other BMJ products and to exploit all rights, as set out in our [licence](#).

The Submitting Author accepts and understands that any supply made under these terms is made by BMJ to the Submitting Author unless you are acting as an employee on behalf of your employer or a postgraduate student of an affiliated institution which is paying any applicable article publishing charge ("APC") for Open Access articles. Where the Submitting Author wishes to make the Work available on an Open Access basis (and intends to pay the relevant APC), the terms of reuse of such Open Access shall be governed by a Creative Commons licence – details of these licences and which [Creative Commons](#) licence will apply to this Work are set out in our licence referred to above.

Other than as permitted in any relevant BMJ Author's Self Archiving Policies, I confirm this Work has not been accepted for publication elsewhere, is not being considered for publication elsewhere and does not duplicate material already published. I confirm all authors consent to publication of this Work and authorise the granting of this licence.

## Measurements of Resilience and Grit among Internal Medicine Residents: Validity and Correlations with Medical Knowledge, Professionalism, and Clinical Performance

Fares Alahdab, MD, MSc<sup>1</sup>, Andrew J Halvorsen MS<sup>2</sup>, Jayawant N Mandrekar, PhD<sup>3</sup>, Brianna E Vaa MD<sup>4</sup>, Victor M Montori, MD, MSc<sup>5,6</sup>, Colin P West MD, PhD,<sup>7,8</sup> M Hassan Murad, MD, MPH<sup>1,9</sup>, Thomas J Beckman, MD<sup>10</sup>

<sup>1</sup>Mayo Evidence-Based Practice Center, Mayo Clinic, Rochester, Minnesota.

<sup>2</sup>Office of Educational Innovations, Internal Medicine Residency Program, Mayo Clinic, Rochester, Minnesota.

<sup>3</sup>Division of Biomedical Statistics and Informatics, Department of Health Sciences Research, Mayo Clinic, Rochester, Minnesota.

Division of Community Internal Medicine, Assistant Professor of Medicine, Mayo Clinic, Rochester, Minnesota

<sup>5</sup>Knowledge and Evaluation Research Unit, Mayo Clinic, Rochester, Minnesota.

<sup>6</sup>Division of Endocrinology, Diabetes, Metabolism, and Nutrition, Mayo Clinic, Rochester, Minnesota.

<sup>7</sup>Division of General Internal Medicine, Department of Medicine, Mayo Clinic, Rochester, Minnesota

<sup>8</sup>Division of Biomedical Statistics and Informatics, Department of Health Sciences Research, Mayo Clinic, Rochester, Minnesota

<sup>9</sup>Division of Preventive, Occupational, and Aerospace Medicine, Mayo Clinic, Rochester, Minnesota.

<sup>10</sup>Division of General Internal Medicine, Department of Internal Medicine, Mayo Clinic, Rochester, Minnesota.

Corresponding author:

Fares Alahdab, MD, MSc

Mayo Evidence-Based Practice Center

Mayo Clinic, Rochester, MN

Email: [fares.alahdab@gmail.com](mailto:fares.alahdab@gmail.com)

Twitter: @fares\_alahdab

Keywords: resilience, grit, validity analysis, medical education, residency, wellbeing, burnout

Word count: 2,884

## Abstract

**Objectives:** There has been limited research on the positive aspects of physician wellness and to our knowledge there have been no validity studies on measures of resilience and grit among internal medicine (IM) residents. We aimed to investigate the validity of resilience (CD-RISC 10) and grit (GRIT-S) scores among IM residents, and assess potential associations with previously validated measures of medical knowledge, clinical performance, and professionalism.

**Setting:** Large academic center in Rochester, MN between July 2017 and June 2019.

**Participants:** IM residents.

**Primary and secondary outcome measures:** We evaluated CD-RISC 10 and GRIT-S scores. We analyzed dimensionality, internal consistency reliability, and criterion validity in terms of relationships between resilience and grit, with standardized measures of residents' medical knowledge (in-training examination [ITE]), clinical performance (faculty and peer evaluations and mini-clinical evaluation exercise [mini-CEX]), and professionalism/dutifulness (conference attendance and evaluation completion).

**Results:** A total of 213 out of 253 (84.2%) survey-eligible IM residents provided both CD-RISC 10 and GRIT-S survey responses. Internal consistency reliability (Cronbach alpha) was excellent for CD-RISC 10 (0.93) and GRIT-S (0.82) overall, and for the GRIT subscales of consistency of interest (0.84) and perseverance of effort (0.71). CD-RISC 10 scores were negatively associated with ITE percentile ( $\beta = -3.4$ , 95% CI: -6.2 to -0.5,  $P=0.02$ ) and mini-CEX ( $\beta = -0.2$ , 95% CI: -0.5 to -0.02,  $P=0.03$ ). GRIT-S scores were positively associated with evaluation completion percentage ( $\beta = 2.51$ , 95% CI: 0.35 to 4.67,  $P=0.02$ ) and conference attendance ( $\beta = 2.70$ , 95% CI: 0.11 to 5.29,  $P=0.04$ ).

**Conclusions:** This study revealed favorable validity evidence for CD-RISC 10 and GRIT-S among IM residents. Residents demonstrated resilience within a competitive training environment despite less favorable test performance and grittiness that was manifested by completing tasks. This initial validity study provides a foundation for further research on resilience and grit among physicians-in-training.

## Strengths and limitations of this study

- This is the first validity study of CD-RISC 10 and Grit-S scores among IM residents for resilience and grit respectively, and was completed at a large academic center in the U.S.
- This study evaluated the dimensionality, internal consistency reliability, and the criterion validity of these two measures among IM residents.
- This study provides a foundation for further research on resilience and grit among physicians in training.
- This was an observational study, which limits the ability to draw causal inferences about the relationships found.
- The analysis did not adjust for resident age, gender, or international versus U.S. medical graduation status, as they are non-modifiable variables in terms of career development and enhancing residency curricula.

## BACKGROUND

The phenomenon of “physician burnout” was first defined in the 1970s as “chronic stress associated with emotionally intense work demands, for which resources are inadequate”.<sup>1,2</sup> It is typically described as a workplace syndrome involving emotional exhaustion, depersonalization, and a sense of reduced personal accomplishment. Emotional exhaustion pertains to feeling drained by work with limited reserve for offering empathetic support to patients. Depersonalization includes feelings of callousness toward patients and treating them more like objects than human beings.<sup>3</sup> Reduced personal accomplishment means feeling ineffective in helping patients along with a sense of nihilism regarding work-related efforts such as professional advancement.<sup>4</sup> The prevalence of physician burnout in the US is estimated to be approximately 50% among physicians-in-training<sup>5-8</sup> and practicing physicians.<sup>9-11</sup> Notably, burnout rates are higher for physicians than other professionals even after adjusting for work hours.<sup>12</sup>

It is unclear why burnout rates are higher in certain residency programs and among particular individuals within the same clinical settings.<sup>14</sup> Since burnout seems to begin during medical school,<sup>7,15</sup> tackling this problem at earlier stages could help mitigate its consequences later. Furthermore, although there has been much research on correlates of burnout,<sup>4</sup> there is limited research on the positive aspects of physician wellness and very little known about resilience and grit among internal medicine residents.

The American Psychological Association (APA) describes resilience as adapting effectively to stressors such as relationship problems, serious health issues, or workplace and financial challenges.<sup>16</sup> That is, resilience is the capacity to respond to adversity such that goals are achieved at minimal psychological and physical cost. Essentially, resilient individuals “bounce back” after challenges while also growing stronger.<sup>17</sup> Although several models of resilience have evolved over the years,<sup>18</sup> the dominant paradigm of resilience is dynamic, linking neurobiology, behavior, and environmental conditions.<sup>19</sup> Resilience is considered essential for enhancing quality of medical care, empathy for patients, and sustainability of the healthcare workforce as a whole.<sup>17</sup> Moreover, low resilience may impair brain function, even resulting in posttraumatic stress disorder (PTSD), depression, and other psychiatric disorders.<sup>20</sup> Yet, most people do not develop such conditions after experiencing difficult life events and are thus considered to be “resilient”. Resilience as a successful adaptation relies on effective responses to environmental challenges and, ultimately, resistance to the harmful effects of stress.<sup>21</sup> Therefore, a greater understanding of the factors that promote resilience is critical.<sup>22</sup>

1  
2  
3 The most widely used assessment of resilience is the Connor-Davidson Resilience  
4 Scale (CD-RISC) which consists of 25 items rated on 5-point scales ranging from 0 to 4,  
5 with higher scores indicating greater resilience.<sup>23</sup> It has sound psychometric properties  
6 and distinguishes between those with greater and lesser resilience levels. Use of the  
7 CD-RISC has shown that resilience is modifiable and can be improved. A shorter  
8 version of this scale, which has similar psychometric properties, is the 10-item, CD-  
9 RISC 10.<sup>24</sup> Evidence based on the use of this assessment measure suggests that  
10 resilience can be promoted in healthcare workplaces,<sup>25</sup> although research on  
11 physicians is scarce.  
12  
13  
14  
15

16 Grit is defined as the perseverance and passion for long-term goals.<sup>26-28</sup> Rather than  
17 avoidance and shying away, grit means working towards achieving specific outcomes  
18 despite difficulty, failure, or adversity.<sup>29</sup> Individuals who remain focused on a goal or  
19 task and see it through to satisfactory completion would be described as “gritty”.<sup>30</sup> Grit  
20 is a predictor of success in stressful, high-achievement fields including, but not limited  
21 to, surgical residency,<sup>31-33</sup> emergency residency,<sup>34</sup> military,<sup>27</sup> and pharmacy.<sup>35</sup> The  
22 original Grit Scale (Grit-O) consists of 12 items, each rated on a 5-point scale, (1-5)  
23 classified under two main domains: 1) consistency of interest, and 2) perseverance of  
24 effort, with six elements each.<sup>26</sup> Subsequently, an abbreviated (8-question) scale with  
25 improved psychometric properties was developed by the same investigators to measure  
26 trait-level perseverance and passion for long-term goals (Grit-S),<sup>27</sup>  
27  
28  
29  
30

31 Although there has been ample research on relationships between burnout and various  
32 aspects of professionalism and clinical performance among resident physicians,<sup>36-40</sup> to  
33 our knowledge the CD-RISC 10 and Grit-S scales have not been previously validated in  
34 U.S. internal medicine residents.  
35  
36

37 In this study we assessed the validity of CD-RISC 10 and Grit-S scores among internal  
38 medicine (IM) residents at a large academic medical center. Additionally, we examined  
39 associations between resident resilience and grit based on CD-RISC 10 and Grit-S  
40 scores, respectively, with previously standardized measures of medical knowledge (the  
41 in-training examination), professionalism (dutifulness based on conference attendance  
42 and evaluation completion), and clinical performance (validated, multisource, clinical  
43 performance evaluations).  
44  
45  
46

## 47 **METHODS**

### 48 **Study Design and Sample**

49  
50 This was a longitudinal cohort study of IM residents training at Mayo Clinic Rochester  
51 between July 2017 and June 2019 who were invited to participate in the Mayo Internal  
52 Medicine Well-Being (IMWELL) Study. We used existing survey data from the IMWELL  
53 study in addition to administrative data collected routinely on IM residents at Mayo Clinic  
54  
55  
56  
57



1  
2  
3 in Rochester, MN. This study was deemed exempt by the Mayo Institutional Review  
4 Board.  
5

### 6 **The Mayo IMWELL Study**

7  
8 The prospective, longitudinal, Mayo IMWELL study was initiated in 2003 to evaluate IM  
9 residents' burnout, quality of life, and empathy, along with other measures of well-being  
10 <sup>41-44</sup>. Enrollment is voluntary and is offered during the orientation of all new interns  
11 (categorical and preliminary) in the IM residency program. For the time frame between  
12 July 2017 to June 2019, 253 residents were eligible to be enrolled as participants and  
13 were surveyed twice per year. An additional survey was sent each spring to graduating  
14 categorical residents. Identities of participants were anonymized during data collection  
15 and before analysis using numerical codes. The CD-RISC 10 and Grit-S instruments  
16 were added to the IMWELL study surveys starting July 2017. The CD-RISC 10 and Grit-  
17 S scores from the IMWELL study for each resident were merged with each resident's  
18 residency performance metrics during the subsequent 6 months (July to December or  
19 January to June) on the other relevant instruments described below.  
20  
21  
22  
23  
24

### 25 **Instruments and Scales Used**

26  
27 Short Grit Scale (Grit-S): An 8-item assessment, each rated on a 5-point scale (1=Not  
28 like me at all, 2=Not much like me, 3=Somewhat like me, 4=Mostly like me, 5=Very  
29 much like me), covering two factors, <sup>27</sup> that measures trait-level perseverance and  
30 passion for long-term goals. It has 4 fewer items than the original grit scale (Grit-O) <sup>26</sup>  
31 with improved psychometric properties. The Short Grit (Grit-S) scale is a brief version of  
32 the original 12-item Grit-O scale. Previous studies have shown that it has predictive  
33 validity, consensual validity, and test-retest stability. Factor analysis, and later  
34 confirmatory factor analysis, has supported a 2-factor structure of the scale reflecting  
35 "consistency of interest" and "perseverance of effort". Both factors showed adequate  
36 internal consistency reliability. <sup>27</sup>  
37  
38  
39  
40

41  
42 10 item Connor-Davidson Resilience Scale (CD-RISC 10): An assessment consisting of  
43 10 items, rated on a 5-point scales (0=Not true at all, 1=Rarely true, 2=Sometimes true,  
44 3=Often true, 4=True nearly all of the time), with higher scores indicating greater  
45 resilience. <sup>23</sup> It has ability to distinguish between those with greater and lesser resilience  
46 levels, and to demonstrate that resilience is modifiable and can be improved. The  
47 reliability and validity of the Connor-Davidson Resilience scale (CD-RISC) were  
48 previously evaluated and performed well in other settings. Factor analysis revealed five  
49 factors for the CD-RISC scale. <sup>23</sup> CD-RISC 10 is a 10-item version of this scale with  
50 good internal consistency and evidence to support construct validity. <sup>24</sup> Further  
51 validation studies have shown excellent performance of the CD-RISC 10 among the  
52 general population <sup>45</sup> and trainees in the United States Air Force. <sup>46</sup>  
53  
54  
55  
56  
57

1  
2  
3 Knowledge measures: This included In-Training Exam (ITE) score percentiles.  
4 Residents were administered the ITE annually each fall. Validity of the ITE scores has  
5 been established in several studies.<sup>47 48</sup>  
6

7  
8 Professionalism and dutifulness measures: This included conference attendance and  
9 evaluation completion, which were validated in our previous studies of residents at the  
10 Mayo Clinic.<sup>49</sup> Conference attendance was assessed using in-person card-swipe data.  
11 Evaluation completion percentage was determined from the MedHub® residency  
12 evaluation system for our study's time frame.  
13  
14

15 Clinical performance: This was determined by faculty and peer evaluations and the  
16 standardized Mini Clinical Evaluation Examination (Mini-CEX).<sup>50 51</sup> The Mini-CEX  
17 evaluates core clinical skills by trainees, namely medical interviewing, physical  
18 examination, informed decision-making/counseling, and clinical judgment/reasoning.  
19 The Mini-CEX has demonstrated validity evidence among internal medicine residents.  
20  
21  
22  
23  
24  
25  
26  
27  
28  
29  
30  
31  
32  
33  
34  
35  
36  
37  
38  
39  
40  
41  
42  
43  
44  
45  
46  
47  
48  
49  
50  
51  
52  
53  
54  
55  
56  
57  
58  
59  
60

The Mini-CEX used at Mayo Clinic Rochester incorporates a 5-point scale. Multisource assessments of residents' clinical performance at Mayo Clinic Rochester are completed by faculty, peers and senior medical residents. Items within these clinical performance assessments have shown multi-dimensionality and excellent internal consistency reliability.<sup>54 55</sup> The clinical performance evaluations (peer evaluations, faculty evaluations, and mini-CEX ratings) are administered by the residency evaluation platform, MedHub®. Aggregate reports of evaluations can be obtained by timeframe of interest, with all assessments standardized to a score in the range of 0-10.

## Data Analysis

Participants' demographics were summarized using descriptive statistics. Continuous variables such as age were summarized as mean (standard deviation). Nominal variables, such as gender, were reported using a count (percent of total). A threshold of  $p < 0.05$  was used to determine statistical significance. Statistical analyses were conducted using SAS version 9.4 (SAS Institute, Inc., Cary, NC).

## Validation of the CD-RISC 10 and Grit-S Scales among Internal Medicine Residents

It has been recommended to re-examine the validity of assessments when applying them to specific contexts and educational settings.<sup>56</sup> Therefore, we evaluated the internal structure validity of the CD-RISC 10 and Grit-S for this study as follows:

1. Factor analyses of the CD-RISC 10 & Grit-S instruments were done using principal components analysis with a minimum eigenvalue of 1 criterion. An orthogonal Varimax rotation was used to estimate item loadings. Items with factor loadings of 0.48 or more were retained.<sup>57</sup> Internal consistency reliabilities for

items comprising each factor and overall were determined using Cronbach alpha, where alpha >0.7 was considered acceptable.<sup>57</sup> Scale values were reversed for the 'Consistency of Interest' factor items of Grit-S (1, 3, 5, and 6) so that 1=very much like me, 2=mostly like me, 3=somewhat like me, 4=not much like me, 5=not like me at all, so that higher item scores reflect increased 'Grit'.

2. Criterion validity (relations to other variables): Unadjusted bivariate associative analyses used generalized linear models with normal response distributions and identity link functions estimated via generalized estimating equations (GEEs) with an exchangeable covariance matrix. The CD-RISC 10 and Grit-S scores were treated as the explanatory variables, and residency performance in the various metrics during the subsequent 6 months were the outcome variables.

### **Patient and public involvement:**

Patients and the public were not involved in this research study.

## **RESULTS**

### **Sample Characteristics**

From a total of 253 eligible IM residents training at Mayo Clinic Rochester between July 2017 and June 2019, 213 (84.2%) completed at least 1 IMWELL survey, resulting in 468 completed CD-RISC 10 and 472 Grit-S surveys from a total of 801 possible surveys. A total of 461 IMWELL surveys included complete responses for both scales. There were 193 ITE percentiles and 358 mini-CEX evaluations available for the same time period. The demographic characteristics of the participants are shown in Table 1.

### **Medical Knowledge, Clinical Performance, and Professionalism Metrics**

The ITE score percentiles among residents in our study (N=193) ranged from 18-100, with a mean (SD) of 83.3 (15.5). Clinical performance, as reflected by faculty evaluations (N=429), peer evaluations (N=362), and mini-CEX (N=358) showed mean (SD) scores of 7.84 (0.69), 8.09 (0.83), and 8.19 (1.59), respectively. Performance measure summaries are shown in Table 2.

### **Validity Analyses of the CD-RISC 10 and GRIT-S Instruments**

Regarding the internal structure validity evidence for the scales among IM residents, the CD-RISC 10 index demonstrated a single dimension of resilience while the GRIT-S index demonstrated two dimensions of grittiness. The internal consistency reliability for both scales overall, and for the GRIT subscales, was high (Cronbach  $\alpha$ 's>0.7, Tables 3 and 4).

1  
2  
3 The 468 completed CD-RISC 10 scales showed mean scores for individual items  
4 ranging from 2.74 (not easily discouraged by failure) to 3.34 (can achieve goals despite  
5 obstacles) on the 0-4 scale [Table 3]. The overall mean summed (SD) CD-RISC score  
6 was 31.5 (6.1). The 472 completed GRIT-S scales showed individual-item mean scores  
7 ranging from 2.99 (new ideas and projects sometimes distract me from previous ones)  
8 to 4.48 (I am a hard worker) on the 1-5 scale [Table 4]. The overall mean (SD) GRIT-S  
9 score was 3.72 (0.59).

10  
11  
12  
13 Regarding relations to other variables (i.e., criterion) validity evidence, the CD-RISC 10  
14 overall summed scores correlated negatively with medical knowledge acquisition as  
15 measured by ITE score percentile ( $\beta = -0.34$ , 95% CI: -0.62 to -0.05,  $P=0.02$ ). The CD-  
16 RISC 10 overall summed scores also correlated negatively with clinical performance as  
17 measured by the mini-CEX ( $\beta = -0.02$ , 95% CI: -0.05 to -0.002,  $P=0.03$ ) (Table 5).

18  
19  
20  
21 The GRIT-S overall mean score correlated positively with evaluation completion  
22 percentage ( $\beta = 2.51$ , 95% CI: 0.35 to 4.67,  $P=0.02$ ) and in-person conference  
23 attendance ( $\beta = 2.70$ , 95% CI: 0.11 to 5.29,  $P=0.04$ ) (Table 5), which are measures of  
24 the dutifulness aspect of professionalism.  
25

## 26 27 **DISCUSSION**

28  
29 The CD-RISC 10 and GRIT-S instruments have strong validity in measuring resilience  
30 and grit in several populations<sup>24 27 46 58</sup> and there have been studies of grit in surgical<sup>32</sup>  
31<sup>33 59</sup> and emergency medicine residents.<sup>34</sup> However, to our knowledge, this is the first  
32 validity study of the CD-RISC 10 and GRIT-S among IM residents. Both instruments  
33 showed excellent internal consistency reliability, statistically significant associations with  
34 previously validated measures of resident physician performance, and dimensionality  
35 characteristics that are consistent with previous research.  
36  
37  
38

39 We identified a negative association between residents' CD-RISC 10 scores and  
40 measures of clinical performance (mini-CEX) and medical knowledge (ITE). This finding  
41 might reflect resilient residents' abilities to thrive within a high-pressured IM training  
42 environment, despite performing less favorably on standardized assessments within this  
43 setting. This finding may be supported by the residents' highest score on the item,  
44 "achieve goals despite obstacles." We also identified a positive association between  
45 GRIT-S scores and evaluation completion, which is a dutifulness aspect of  
46 professionalism.<sup>26 60</sup> These findings suggest that, as expected, residents with grittiness  
47 tend to finish tasks. Additionally, this finding corresponds to residents' highest score on  
48 the item, "I am a hard worker." Overall, our research should inform future interventions  
49 to decrease resident burnout and improve resident performance and well-being, by  
50 using specific dimensions of the CD-RISC 10 and GRIT-S as roadmaps for curricular  
51 interventions.  
52  
53  
54  
55  
56  
57  
58  
59  
60

1  
2  
3 Compared to the general U.S. population included in the original validation studies,<sup>23 58</sup>  
4<sup>61</sup> the overall mean (SD) resilience score in our sample was comparable [31.5 (6.1)  
5 versus 32.1 (5.8) and 31.8 (5.4)]. However, compared to the reference group aged 25-  
6 34 years in the original validation study, the overall mean (SD) GRIT-S score in our  
7 sample was higher [3.72 (0.59) versus 3.2 (0.7)].<sup>27</sup> Our study participants noted strong  
8 perseverance as reflected by their highest GRIT-S score on the item “I am a hard  
9 worker.” Additionally, the dimensionalities for the GRIT-S and CD-RISC 10 scales in our  
10 study were consistent with findings from research in different populations.<sup>62 63</sup>  
11 However, despite having higher grit and comparable resilience as compared to the  
12 general population, burnout rates among physicians and physicians-in-training appear  
13 to be greater than that of the U.S. working population.<sup>7 12</sup> This suggests that the  
14 medical profession selects gritty and resilient individuals, yet still manages to burn them  
15 out. Furthermore, research shows that wellbeing indicators are highest upon  
16 matriculation to medical school, and subsequently wane throughout medical training.<sup>64</sup>  
17 Consequently, future research should examine the interactions between burnout,  
18 empathy, resilience, and grit.  
19  
20  
21  
22  
23  
24

25 This study has several limitations. First, it was observational, which constrains the ability  
26 to draw causal inferences about the relationships that were identified. Second, the  
27 analysis did not adjust for age, gender, and international versus U.S. medical  
28 graduation status. Nonetheless, these are non-modifiable variables that would not  
29 facilitate efforts at professional development or enhancing residency curricula. Third,  
30 this study involved IM residents at a large academic medical center, which may limit  
31 generalization to some other specialties and settings.  
32  
33  
34

35 Resilience and grit may lessen burnout, yet these relationships remain unclear among  
36 physicians in training. Thus, research on resilience and grit could assist interventions to  
37 mitigate physician burnout<sup>65 66</sup> and provide a deeper understanding of dynamics  
38 between the issues at play.<sup>67</sup> Findings from this study support use of the CD-RISC  
39 10 and GRIT-S among internal medicine residents and should serve as a foundation for  
40 future research on resilience and grit in medical learners. This research should examine  
41 associations among IM residents between CD-RISC 10 and GRIT-S, with validated  
42 measures of burnout and well-being. It is noteworthy that burnout is prevalent within  
43 current medical education and training systems and may be an indicator of  
44 organizational health.<sup>68 69</sup> Therefore, improved understanding of resilience and grit may  
45 enhance graduate medical education curricula<sup>40 70-73</sup> and the wellbeing of physicians.  
46  
47  
48  
49  
50

51 There have been ample investigations on physician burnout and depression, yet there  
52 has been less research on positive aspects of physician wellness including resilience  
53 and grit among internal medicine residents. Especially during this era of the COVID  
54 pandemic, it is necessary to better understand characteristics of physicians that allow  
55  
56  
57

1  
2  
3 them to surmount adversity and thrive. We are hopeful that further study of residents'  
4 resilience and grit will help to improve their quality of life. <sup>31 59 74</sup>  
5

6  
7 **Author contributions:**

8 Idea conception: TJB, FA, CPW, VMM

9 Study design and methodology: FA, TJB, AJH

10 Data management and analysis: AJH, JNM

11 Interpretation of the data: FA, AJH, TJB

12 Manuscript drafting: FA

13 Supervision: TJB

14 Revising, editing, and final approval of manuscript: all authors.  
15  
16  
17

18 **Disclosure:**

19 No conflicts of interest, financial or other, to declare by any of the authors.  
20  
21

22 Dissemination of study results to study participants is not applicable.  
23

24 No additional data available.  
25  
26  
27  
28  
29  
30  
31  
32  
33  
34  
35  
36  
37  
38  
39  
40  
41  
42  
43  
44  
45  
46  
47  
48  
49  
50  
51  
52  
53  
54  
55  
56  
57  
58  
59  
60



## REFERENCES

1. Freudenberger HJ. Staff Burn-Out. *Journal of Social Issues* 1974;30:159-65. doi: <https://doi.org/10.1111/j.1540-4560.1974.tb00706.x>
2. Schaufeli WB, Leiter, M. P., & Maslach, C. Burnout: 35 Years of Research and Practice. . *Career Development International* 2009;14:204-20. doi: <http://dx.doi.org/10.1108/13620430910966406>
3. Schaufeli WB, Bakker AB, Hoogduin K, et al. on the clinical validity of the maslach burnout inventory and the burnout measure. *Psychol Health* 2001;16(5):565-82. doi: 10.1080/08870440108405527 [published Online First: 2001/09/01]
4. Williams ES, Manwell LB, Konrad TR, et al. The relationship of organizational culture, stress, satisfaction, and burnout with physician-reported error and suboptimal patient care: results from the MEMO study. *Health Care Manage Rev* 2007;32(3):203-12. doi: 10.1097/01.HMR.0000281626.28363.59 [published Online First: 2007/08/02]
5. Dyrbye L, Shanafelt T. A narrative review on burnout experienced by medical students and residents. *Med Educ* 2016;50(1):132-49. doi: 10.1111/medu.12927 [published Online First: 2015/12/24]
6. Dyrbye LN, Thomas MR, Massie FS, et al. Burnout and suicidal ideation among U.S. medical students. *Ann Intern Med* 2008;149(5):334-41. [published Online First: 2008/09/04]
7. Dyrbye LN, West CP, Satele D, et al. Burnout among U.S. medical students, residents, and early career physicians relative to the general U.S. population. *Acad Med* 2014;89(3):443-51. doi: 10.1097/ACM.000000000000134 [published Online First: 2014/01/23]
8. West CP, Shanafelt TD, Kolars JC. Quality of life, burnout, educational debt, and medical knowledge among internal medicine residents. *JAMA* 2011;306(9):952-60. doi: 10.1001/jama.2011.1247 [published Online First: 2011/09/09]
9. Linzer M, Visser MR, Oort FJ, et al. Predicting and preventing physician burnout: results from the United States and the Netherlands. *Am J Med* 2001;111(2):170-5. [published Online First: 2001/08/11]
10. Allegra CJ, Hall R, Yothers G. Prevalence of burnout in the u.s. Oncology community: results of a 2003 survey. *J Oncol Pract* 2005;1(4):140-7. doi: 10.1200/JOP.2005.1.4.140 [published Online First: 2005/11/01]
11. Shanafelt TD, Boone S, Tan L, et al. Burnout and satisfaction with work-life balance among US physicians relative to the general US population. *Arch Intern Med* 2012;172(18):1377-85. doi: 10.1001/archinternmed.2012.3199 [published Online First: 2012/08/23]
12. Shanafelt TD, Hasan O, Dyrbye LN, et al. Changes in Burnout and Satisfaction With Work-Life Balance in Physicians and the General US Working Population Between 2011 and 2014. *Mayo Clin Proc* 2015;90(12):1600-13. doi: 10.1016/j.mayocp.2015.08.023 [published Online First: 2015/12/15]
13. Shanafelt TD, West CP, Sinsky C, et al. Changes in Burnout and Satisfaction With Work-Life Integration in Physicians and the General US Working Population Between 2011 and 2017. *Mayo Clin Proc* 2019;94(9):1681-94. doi: 10.1016/j.mayocp.2018.10.023 [published Online First: 2019/02/26]
14. Quinn MA, Bazari H, Ripp J, et al. A Roadmap for Research on Resident Well-Being. *Am J Med* 2018;131(3):323-28. doi: 10.1016/j.amjmed.2017.12.001 [published Online First: 2017/12/17]
15. Brazeau CM, Shanafelt T, Durning SJ, et al. Distress among matriculating medical students relative to the general population. *Acad Med* 2014;89(11):1520-5. doi: 10.1097/ACM.0000000000000482 [published Online First: 2014/09/25]
16. Lillian Comas-Diaz P, Suniya S. Luthar, PhD, Salvatore R. Maddi, PhD, H. Katherine (Kit) O'Neill, PhD, Karen W. Saakvitne, PhD, Richard Glenn Tedeschi, PhD. The Road to Resilience. <https://www.apa.org/helpcenter/road-resilience.aspx>: American Psychological Association.

17. Epstein RM, Krasner MS. Physician resilience: what it means, why it matters, and how to promote it. *Acad Med* 2013;88(3):301-3. doi: 10.1097/ACM.0b013e318280cff0 [published Online First: 2013/02/28]
18. Chmitorz A, Kunzler A, Helmreich I, et al. Intervention studies to foster resilience - A systematic review and proposal for a resilience framework in future intervention studies. *Clin Psychol Rev* 2018;59:78-100. doi: 10.1016/j.cpr.2017.11.002 [published Online First: 2017/11/24]
19. Sapienza JK, Masten AS. Understanding and promoting resilience in children and youth. *Curr Opin Psychiatry* 2011;24(4):267-73. doi: 10.1097/YCO.0b013e32834776a8 [published Online First: 2011/05/07]
20. Patel RS, Bachu R, Adikey A, et al. Factors Related to Physician Burnout and Its Consequences: A Review. *Behav Sci (Basel)* 2018;8(11) doi: 10.3390/bs8110098 [published Online First: 2018/10/28]
21. Russo SJ, Murrough JW, Han MH, et al. Neurobiology of resilience. *Nat Neurosci* 2012;15(11):1475-84. doi: 10.1038/nn.3234 [published Online First: 2012/10/16]
22. Wu G, Feder A, Cohen H, et al. Understanding resilience. *Front Behav Neurosci* 2013;7:10. doi: 10.3389/fnbeh.2013.00010 [published Online First: 2013/02/21]
23. Connor KM, Davidson JR. Development of a new resilience scale: the Connor-Davidson Resilience Scale (CD-RISC). *Depress Anxiety* 2003;18(2):76-82. doi: 10.1002/da.10113 [published Online First: 2003/09/10]
24. Campbell-Sills L, Stein MB. Psychometric analysis and refinement of the Connor-davidson Resilience Scale (CD-RISC): Validation of a 10-item measure of resilience. *J Trauma Stress* 2007;20(6):1019-28. doi: 10.1002/jts.20271 [published Online First: 2007/12/25]
25. Jackson D FA, Edenborough M. Personal resilience as a strategy for surviving and thriving in the face of workplace adversity: a literature review. *J Adv Nurs* 2007;60(1):1-9. doi: 10.1111/j.1365-2648.2007.04412.x
26. Duckworth AL, Peterson C, Matthews MD, et al. Grit: perseverance and passion for long-term goals. *J Pers Soc Psychol* 2007;92(6):1087-101. doi: 10.1037/0022-3514.92.6.1087 [published Online First: 2007/06/06]
27. Duckworth AL, Quinn PD. Development and validation of the short grit scale (grit-s). *J Pers Assess* 2009;91(2):166-74. doi: 10.1080/00223890802634290 [published Online First: 2009/02/12]
28. Robertson-Kraft C, Duckworth AL. True Grit: Trait-level Perseverance and Passion for Long-term Goals Predicts Effectiveness and Retention among Novice Teachers. *Teach Coll Rec (1970)* 2014;116(3) [published Online First: 2014/11/05]
29. Eskreis-Winkler L, Shulman EP, Beal SA, et al. The grit effect: predicting retention in the military, the workplace, school and marriage. *Front Psychol* 2014;5:36. doi: 10.3389/fpsyg.2014.00036 [published Online First: 2014/02/20]
30. Silvia PJ, Eddington KM, Beaty RE, et al. Gritty people try harder: grit and effort-related cardiac autonomic activity during an active coping challenge. *Int J Psychophysiol* 2013;88(2):200-5. doi: 10.1016/j.ijpsycho.2013.04.007 [published Online First: 2013/04/23]
31. Burkhart RA, Tholey RM, Guinto D, et al. Grit: a marker of residents at risk for attrition? *Surgery* 2014;155(6):1014-22. doi: 10.1016/j.surg.2014.01.015 [published Online First: 2014/05/27]
32. Salles A, Lin D, Liebert C, et al. Grit as a predictor of risk of attrition in surgical residency. *Am J Surg* 2017;213(2):288-91. doi: 10.1016/j.amjsurg.2016.10.012 [published Online First: 2016/12/10]
33. Samuelsen BT, Desai VS, Turner NS, et al. Generational Differences in Grit, Self-Control, and Conscientiousness Among Orthopaedic Surgeons: From Millennials to Baby Boomers. *J Bone Joint Surg Am* 2019;101(14):e71. doi: 10.2106/JBJS.18.00275 [published Online First: 2019/07/19]



- 1
- 2
- 3
- 4 34. Kalantari A. Faculty Assessment of Emergency Medicine Resident Grit: A Multicentered Study. *AEM*
- 5 *Educ Train* 2019;3(1):100. doi: 10.1002/aet2.10305 [published Online First: 2019/01/27]
- 6 35. Hammond DA. Grit: An important characteristic in learners. *Curr Pharm Teach Learn* 2017;9(1):1-3.
- 7 doi: 10.1016/j.cptl.2016.08.048 [published Online First: 2017/11/29]
- 8 36. McClafferty H, Brooks AJ, Chen MK, et al. Pediatric Integrative Medicine in Residency Program:
- 9 Relationship between Lifestyle Behaviors and Burnout and Wellbeing Measures in First-Year
- 10 Residents. *Children (Basel)* 2018;5(4) doi: 10.3390/children5040054 [published Online First:
- 11 2018/04/25]
- 12 37. Panagioti M, Geraghty K, Johnson J, et al. Association Between Physician Burnout and Patient Safety,
- 13 Professionalism, and Patient Satisfaction: A Systematic Review and Meta-analysis. *JAMA Intern*
- 14 *Med* 2018;178(10):1317-30. doi: 10.1001/jamainternmed.2018.3713 [published Online First:
- 15 2018/09/08]
- 16 38. Baer TE, Feraco AM, Tuysuzoglu Sagalowsky S, et al. Pediatric Resident Burnout and Attitudes
- 17 Toward Patients. *Pediatrics* 2017;139(3) doi: 10.1542/peds.2016-2163 [published Online First:
- 18 2017/02/25]
- 19 39. Brown R, Dunn S, Byrnes K, et al. Doctors' stress responses and poor communication performance in
- 20 simulated bad-news consultations. *Acad Med* 2009;84(11):1595-602. doi:
- 21 10.1097/ACM.0b013e3181baf537 [published Online First: 2009/10/28]
- 22 40. Fahrenkopf AM, Sectish TC, Barger LK, et al. Rates of medication errors among depressed and burnt
- 23 out residents: prospective cohort study. *BMJ* 2008;336(7642):488-91. doi:
- 24 10.1136/bmj.39469.763218.BE [published Online First: 2008/02/09]
- 25 41. West CP, Dyrbye LN, Sloan JA, et al. Single item measures of emotional exhaustion and
- 26 depersonalization are useful for assessing burnout in medical professionals. *J Gen Intern Med*
- 27 2009;24(12):1318-21. doi: 10.1007/s11606-009-1129-z [published Online First: 2009/10/06]
- 28 42. West CP, Tan AD, Habermann TM, et al. Association of resident fatigue and distress with perceived
- 29 medical errors. *JAMA* 2009;302(12):1294-300. doi: 10.1001/jama.2009.1389 [published Online
- 30 First: 2009/09/24]
- 31 43. Beckman TJ, Reed DA, Shanafelt TD, et al. Impact of resident well-being and empathy on
- 32 assessments of faculty physicians. *J Gen Intern Med* 2010;25(1):52-6. doi: 10.1007/s11606-009-
- 33 1152-0 [published Online First: 2009/11/03]
- 34 44. Beckman TJ, Reed DA, Shanafelt TD, et al. Resident physician well-being and assessments of their
- 35 knowledge and clinical performance. *J Gen Intern Med* 2012;27(3):325-30. doi: 10.1007/s11606-
- 36 011-1891-6 [published Online First: 2011/09/29]
- 37 45. Ni MY, Li TK, Yu NX, et al. Normative data and psychometric properties of the Connor-Davidson
- 38 Resilience Scale (CD-RISC) and the abbreviated version (CD-RISC2) among the general population
- 39 in Hong Kong. *Qual Life Res* 2016;25(1):111-6. doi: 10.1007/s11136-015-1072-x [published
- 40 Online First: 2015/07/23]
- 41 46. Bezdjian S, Schneider KG, Burchett D, et al. Resilience in the United States Air Force: Psychometric
- 42 properties of the Connor-Davidson Resilience Scale (CD-RISC). *Psychol Assess* 2017;29(5):479-85.
- 43 doi: 10.1037/pas0000370 [published Online First: 2016/08/10]
- 44 47. Garibaldi RA, Trontell MC, Waxman H, et al. The in-training examination in internal medicine. *Ann*
- 45 *Intern Med* 1994;121(2):117-23. doi: 10.7326/0003-4819-121-2-199407150-00008 [published
- 46 Online First: 1994/07/15]
- 47 48. Garibaldi RA, Subhiyah R, Moore ME, et al. The In-Training Examination in Internal Medicine: an
- 48 analysis of resident performance over time. *Ann Intern Med* 2002;137(6):505-10. doi:
- 49 10.7326/0003-4819-137-6-200209170-00011 [published Online First: 2002/09/17]
- 50 49. Reed DA, West CP, Mueller PS, et al. Behaviors of highly professional resident physicians. *JAMA*
- 51 2008;300(11):1326-33. doi: 10.1001/jama.300.11.1326 [published Online First: 2008/09/19]
- 52
- 53
- 54
- 55
- 56
- 57
- 58
- 59
- 60

- 1  
2  
3  
4  
5  
6  
7  
8  
9  
10  
11  
12  
13  
14  
15  
16  
17  
18  
19  
20  
21  
22  
23  
24  
25  
26  
27  
28  
29  
30  
31  
32  
33  
34  
35  
36  
37  
38  
39  
40  
41  
42  
43  
44  
45  
46  
47  
48  
49  
50  
51  
52  
53  
54  
55  
56  
57  
58  
59  
60
50. Cook DA, Beckman TJ, Mandrekar JN, et al. Internal structure of mini-CEX scores for internal medicine residents: factor analysis and generalizability. *Adv Health Sci Educ Theory Pract* 2010;15(5):633-45. doi: 10.1007/s10459-010-9224-9 [published Online First: 2010/12/02]
  51. Norcini JJ, Blank LL, Duffy FD, et al. The mini-CEX: a method for assessing clinical skills. *Ann Intern Med* 2003;138(6):476-81. doi: 10.7326/0003-4819-138-6-200303180-00012 [published Online First: 2003/03/18]
  52. Cook DA, Beckman TJ. Does scale length matter? A comparison of nine- versus five-point rating scales for the mini-CEX. *Adv Health Sci Educ Theory Pract* 2009;14(5):655-64. doi: 10.1007/s10459-008-9147-x [published Online First: 2008/11/27]
  53. Hatala R, Ainslie M, Kassen BO, et al. Assessing the mini-Clinical Evaluation Exercise in comparison to a national specialty examination. *Med Educ* 2006;40(10):950-6. doi: 10.1111/j.1365-2929.2006.02566.x [published Online First: 2006/09/22]
  54. Beckman TJ, Mandrekar JN, Engstler GJ, et al. Determining reliability of clinical assessment scores in real time. *Teach Learn Med* 2009;21(3):188-94. doi: 10.1080/10401330903014137 [published Online First: 2010/02/26]
  55. Post JA, Wittich CM, Thomas KG, et al. Rating the Quality of Entrustable Professional Activities: Content Validation and Associations with the Clinical Context. *J Gen Intern Med* 2016;31(5):518-23. doi: 10.1007/s11606-016-3611-8 [published Online First: 2016/02/24]
  56. Beckman TJ, Cook DA, Mandrekar JN. Factor instability of clinical teaching assessment scores among general internists and cardiologists. *Med Educ* 2006;40(12):1209-16. doi: 10.1111/j.1365-2929.2006.02632.x [published Online First: 2006/11/23]
  57. DeVellis RF. *Scale Development: Theory and Applications*. Newbury Park CA: Sage Publications, Inc. 1991:128.
  58. JRT D. Connor-Davidson Resilience Scale (CD-RISC) Manual. accessible at [www.cd-risc.com](http://www.cd-risc.com), 2018.
  59. Salles A, Cohen GL, Mueller CM. The relationship between grit and resident well-being. *Am J Surg* 2014;207(2):251-4. doi: 10.1016/j.amjsurg.2013.09.006 [published Online First: 2013/11/19]
  60. Miller-Matero LR, Martinez S, MacLean L, et al. Grit: A predictor of medical student performance. *Educ Health (Abingdon)* 2018;31(2):109-13. doi: 10.4103/efh.EfH\_152\_16 [published Online First: 2018/12/12]
  61. Campbell-Sills L, Forde DR, Stein MB. Demographic and childhood environmental predictors of resilience in a community sample. *J Psychiatr Res* 2009;43(12):1007-12. doi: 10.1016/j.jpsychires.2009.01.013 [published Online First: 2009/03/07]
  62. Li C. THE SHOR THE SHORT GRIT SCALE: A DIMENSION T SCALE: A DIMENSIONALITY ANALYSIS. University of Kentucky, 2015.
  63. Daniel F.Gucciardi BJ, Tristan J.Coulter, Clifford J.Mallett. The Connor-Davidson Resilience Scale (CD-RISC): Dimensionality and age-related measurement invariance with Australian cricketers. *Psychology of Sport and Exercise* 2011;12(4):423-33. doi: <https://doi.org/10.1016/j.psychsport.2011.02.005>
  64. Hansell MW, Ungerleider RM, Brooks CA, et al. Temporal Trends in Medical Student Burnout. *Fam Med* 2019;51(5):399-404. doi: 10.22454/FamMed.2019.270753 [published Online First: 2019/05/14]
  65. West CP, Dyrbye LN, Erwin PJ, et al. Interventions to prevent and reduce physician burnout: a systematic review and meta-analysis. *Lancet* 2016;388(10057):2272-81. doi: 10.1016/S0140-6736(16)31279-X [published Online First: 2016/10/04]
  66. Panagioti M, Panagopoulou E, Bower P, et al. Controlled Interventions to Reduce Burnout in Physicians: A Systematic Review and Meta-analysis. *JAMA Intern Med* 2017;177(2):195-205. doi: 10.1001/jamainternmed.2016.7674 [published Online First: 2016/12/06]

- 1  
2  
3 67. Lotte N. Dyrbye TDS, Christine A. Sinsky, Pamela F. Cipriano, Jay Bhatt, Alexander Ommaya, Colin P.  
4 West, David Meyers. Burnout Among Health Care Professionals: A Call to Explore and Address  
5 This Underrecognized Threat to Safe, High-Quality Care. National Academy of Medicine,  
6 2017:[https://nam.edu/burnout-among-health-care-professionals-a-call-to-explore-and-address-](https://nam.edu/burnout-among-health-care-professionals-a-call-to-explore-and-address-this-underrecognized-threat-to-safe-high-quality-care/)  
7 [this-underrecognized-threat-to-safe-high-quality-care/](https://nam.edu/burnout-among-health-care-professionals-a-call-to-explore-and-address-this-underrecognized-threat-to-safe-high-quality-care/).  
8  
9 68. Montgomery A. The inevitability of physician burnout: Implications for interventions. *Burnout*  
10 *Research* 2014;1(1):50-56. doi: <https://doi.org/10.1016/j.burn.2014.04.002>  
11  
12 69. Wallace JE, Lemaire JB, Ghali WA. Physician wellness: a missing quality indicator. *Lancet*  
13 2009;374(9702):1714-21. doi: 10.1016/S0140-6736(09)61424-0 [published Online First:  
14 2009/11/17]  
15  
16 70. Shanafelt TD, West C, Zhao X, et al. Relationship between increased personal well-being and  
17 enhanced empathy among internal medicine residents. *J Gen Intern Med* 2005;20(7):559-64.  
18 doi: 10.1111/j.1525-1497.2005.0108.x [published Online First: 2005/07/30]  
19  
20 71. Firth-Cozens J, Greenhalgh J. Doctors' perceptions of the links between stress and lowered clinical  
21 care. *Soc Sci Med* 1997;44(7):1017-22. [published Online First: 1997/04/01]  
22  
23 72. Shanafelt TD, Bradley KA, Wipf JE, et al. Burnout and self-reported patient care in an internal  
24 medicine residency program. *Ann Intern Med* 2002;136(5):358-67. [published Online First:  
25 2002/03/05]  
26  
27 73. West CP, Huschka MM, Novotny PJ, et al. Association of perceived medical errors with resident  
28 distress and empathy: a prospective longitudinal study. *JAMA* 2006;296(9):1071-8. doi:  
29 10.1001/jama.296.9.1071 [published Online First: 2006/09/07]  
30  
31 74. Halliday L, Walker A, Vig S, et al. Grit and burnout in UK doctors: a cross-sectional study across  
32 specialties and stages of training. *Postgrad Med J* 2017;93(1101):389-94. doi:  
33 10.1136/postgradmedj-2015-133919 [published Online First: 2016/11/20]  
34  
35  
36  
37  
38  
39  
40  
41  
42  
43  
44  
45  
46  
47  
48  
49  
50  
51  
52  
53  
54  
55  
56  
57  
58  
59  
60

**Table 1. Baseline Characteristics of 253 Survey Eligible IM Resident Physicians from July 2017 Through June 2019 (213 [84.2%] IM Resident Physicians Completed 461 [57.6%] CD-RISC 10 / Grit-S Surveys out of 801 possible)**

| Variable          | Level       | Total (N=253) | ≥1 Survey (N=213) | No Survey (N=40) | P value |
|-------------------|-------------|---------------|-------------------|------------------|---------|
| Sex               | Male        | 165 (65.2%)   | 137 (64.3%)       | 28 (70.0%)       | 0.59    |
|                   | Female      | 88 (34.8%)    | 76 (35.7%)        | 12 (30%)         |         |
| Program           | Categorical | 196 (77.5%)   | 170 (79.8%)       | 26 (65.0%)       | 0.06    |
|                   | Preliminary | 57 (22.5%)    | 43 (20.2%)        | 14 (35.0%)       |         |
| Match Year        | 2015        | 50 (19.8%)    | 40 (18.8%)        | 10 (25.0%)       | 0.40    |
|                   | 2016        | 47 (18.6%)    | 39 (18.3%)        | 8 (20.0%)        |         |
|                   | 2017        | 78 (30.8%)    | 70 (32.9%)        | 8 (20.0%)        |         |
|                   | 2018        | 78 (30.8%)    | 64 (30.1%)        | 14 (35.0%)       |         |
| Age               | Mean (SD)   | 253 (100%)    | 27.69 (2.66)      | 27.90 (2.43)     | 0.62    |
| Possible Surveys  | Mean (SD)   | 253 (100%)    | 3.20 (1.17)       | 3.00 (1.18)      | 0.33    |
| Completed Surveys | Mean (SD)   | 253 (100%)    | 2.16 (1.08)       | -                | -       |

**Table 2. Medical Knowledge, Professionalism, and Clinical Performance Measures for 210 IM Resident Physicians Providing Data from July 2017 to June 2019 (N=429)**

| Variable             | Metric (scale)                | n (Eligible) | n (Responses) | Mean (SD)   | Range     |
|----------------------|-------------------------------|--------------|---------------|-------------|-----------|
| Medical Knowledge    | IM-ITE, percentile            | 353          | 193           | 83.3 (15.5) | 18-100    |
| Professionalism      | Conference Attendance, number | 705          | 429           | 53.8 (14.3) | 6-95      |
|                      | Evaluation Completion, %      | 705          | 429           | 77.3 (11.5) | 22-100    |
| Clinical Performance | Faculty Evaluations (0-10)    | 705          | 429           | 7.84 (0.69) | 4.49-9.37 |
|                      | Peer Evaluations (0-10)       | 705          | 362           | 8.09 (0.83) | 4.13-10   |
|                      | Mini-CEX (0-10)               | 705          | 358           | 8.19 (1.59) | 4.00-10   |

**Table 3. IM Resident Physicians' Mean Scores on, Factor Loadings of, and Internal Consistency Reliability of the CD-RISC 10 (N=468)**

| Item                                             | Mean Score (SD) | Item Loading | Cronbach $\alpha$ |
|--------------------------------------------------|-----------------|--------------|-------------------|
| <b>CD-RISC 10 overall (0-40)</b>                 | 31.5 (6.1)      |              | 0.93              |
| 1. Able to adapt to change                       | 3.29 (0.68)     | 0.80         |                   |
| 2. Can deal with whatever comes                  | 3.18 (0.74)     | 0.82         |                   |
| 3. Tries to see humorous side of problems        | 3.19 (0.79)     | 0.71         |                   |
| 4. Coping with stress can strengthen me          | 3.11 (0.79)     | 0.72         |                   |
| 5. Tend to bounce back after illness or hardship | 3.25 (0.76)     | 0.83         |                   |
| 6. Can achieve goals despite obstacles           | 3.34 (0.71)     | 0.82         |                   |
| 7. Can stay focused under pressure               | 3.03 (0.78)     | 0.81         |                   |

|                                      |             |      |  |
|--------------------------------------|-------------|------|--|
| 8. Not easily discouraged by failure | 2.74 (0.91) | 0.75 |  |
| 9. Thinks of self as strong person   | 3.20 (0.78) | 0.83 |  |
| 10. Can handle unpleasant feeling    | 3.19 (0.73) | 0.81 |  |

**Table 4. IM Resident Physicians' Mean Scores on, Factor Loadings of, and Internal Consistency Reliability of the Grit-S (N=472)**

| Item                                                                                                | Mean Score (SD) | Item Loading            |                        | Cronbach $\alpha$ |
|-----------------------------------------------------------------------------------------------------|-----------------|-------------------------|------------------------|-------------------|
|                                                                                                     |                 | Consistency of Interest | Perseverance of Effort |                   |
| <b>Consistency of Interest</b> (reverse-scored)                                                     |                 |                         |                        | 0.84              |
| 1. New ideas and projects sometimes distract me from previous ones.                                 | 2.99 (0.95)     | 0.83                    | 0.002                  |                   |
| 3. I have been obsessed with a certain idea or project for a short time but later lost interest.    | 3.39 (0.95)     | 0.84                    | 0.11                   |                   |
| 5. I often set a goal but later choose to pursue a different one.                                   | 3.63 (0.88)     | 0.80                    | 0.26                   |                   |
| 6. I have difficulty maintaining my focus on projects that take more than a few months to complete. | 3.56 (1.03)     | 0.76                    | 0.29                   |                   |
| Overall Consistency of Interest mean                                                                | 3.39 (0.79)     |                         |                        |                   |
| <b>Perseverance of Effort</b>                                                                       |                 |                         |                        | 0.71              |
| 2. Setbacks don't discourage me.                                                                    | 3.40 (0.94)     | 0.08                    | 0.49                   |                   |
| 4. I am a hard worker.                                                                              | 4.48 (0.70)     | 0.05                    | 0.86                   |                   |
| 7. I finish whatever I begin.                                                                       | 3.95 (0.84)     | 0.47                    | 0.63                   |                   |
| 8. I am diligent.                                                                                   | 4.33 (0.72)     | 0.17                    | 0.87                   |                   |
| Overall Perseverance of Effort mean                                                                 | 4.04 (0.59)     |                         |                        |                   |
| <b>Grit-S Overall (1-5)</b>                                                                         | 3.72 (0.59)     |                         |                        | 0.82              |

**Table 5. Associations of Performance Measures with CD-RISC 10 and Grit-S**

| Variable             | Metric (scale)                | CD-RISC 10 (0-40) |               |         | Grit-S (1-5) |             |         |
|----------------------|-------------------------------|-------------------|---------------|---------|--------------|-------------|---------|
|                      |                               | $\beta$           | 95% CI        | p-value | $\beta$      | 95% CI      | p-value |
| Medical Knowledge    | IM-ITE, percentile            | -0.34             | -0.62, -0.05  | 0.02    | 0.42         | -3.29, 4.12 | 0.83    |
| Professionalism      | Conference Attendance, number | -0.07             | -0.31, 0.18   | 0.59    | 2.70         | 0.11, 5.29  | 0.04    |
|                      | Evaluation Completion, %      | 0.19              | -0.05, 0.43   | 0.13    | 2.51         | 0.35, 4.67  | 0.02    |
| Clinical Performance | Faculty Evaluations (0-10)    | 0.0002            | -0.01, 0.01   | 0.98    | 0.06         | -0.08, 0.20 | 0.38    |
|                      | Peer Evaluations (0-10)       | 0.02              | -0.0006, 0.03 | 0.06    | 0.09         | -0.09, 0.26 | 0.33    |
|                      | Mini-CEX (0-10)               | -0.02             | -0.05, -0.002 | 0.03    | -0.20        | -0.47, 0.06 | 0.13    |

# BMJ Open

## How Do We Assess Resilience and Grit among Internal Medicine Residents at the Mayo Clinic? A Longitudinal Validity Study Including Correlations with Medical Knowledge, Professionalism, and Clinical Performance

|                                 |                                                                                                                                                                                                                                                                                                                                                                                                                                                                                                                                                                                                                                                                                                                                                                                                                                                                                                                                   |
|---------------------------------|-----------------------------------------------------------------------------------------------------------------------------------------------------------------------------------------------------------------------------------------------------------------------------------------------------------------------------------------------------------------------------------------------------------------------------------------------------------------------------------------------------------------------------------------------------------------------------------------------------------------------------------------------------------------------------------------------------------------------------------------------------------------------------------------------------------------------------------------------------------------------------------------------------------------------------------|
| Journal:                        | <i>BMJ Open</i>                                                                                                                                                                                                                                                                                                                                                                                                                                                                                                                                                                                                                                                                                                                                                                                                                                                                                                                   |
| Manuscript ID                   | bmjopen-2020-040699.R1                                                                                                                                                                                                                                                                                                                                                                                                                                                                                                                                                                                                                                                                                                                                                                                                                                                                                                            |
| Article Type:                   | Original research                                                                                                                                                                                                                                                                                                                                                                                                                                                                                                                                                                                                                                                                                                                                                                                                                                                                                                                 |
| Date Submitted by the Author:   | 15-Aug-2020                                                                                                                                                                                                                                                                                                                                                                                                                                                                                                                                                                                                                                                                                                                                                                                                                                                                                                                       |
| Complete List of Authors:       | Alahdab, Fares; Mayo Clinic, Mayo Evidence-based Practice Center<br>Halvorsen, Andrew; Mayo Clinic, Office of Educational Innovations, Internal Medicine Residency Program<br>Mandrekar, Jayawant ; Mayo Clinic, Division of Biomedical Statistics and Informatics, Department of Health Sciences Research<br>Vaa, Brianna; Mayo Clinic, Division of Community Internal Medicine<br>Montori, Victor; Mayo Clinic, Knowledge and Evaluation Research Unit<br>West, Colin; Mayo Clinic, Division of General Internal Medicine, Department of Medicine; Mayo Clinic, Division of Biomedical Statistics and Informatics, Department of Health Sciences Research<br>Murad, M. Hassan; Mayo Clinic, Division of Preventive, Occupational, and Aerospace Medicine; Mayo Clinic, Mayo Evidence-Based Practice Center, Mayo Clinic<br>Beckman, Thomas; Mayo Clinic, Division of General Internal Medicine, Department of Internal Medicine |
| <b>Primary Subject Heading</b>: | Medical education and training                                                                                                                                                                                                                                                                                                                                                                                                                                                                                                                                                                                                                                                                                                                                                                                                                                                                                                    |
| Secondary Subject Heading:      | General practice / Family practice                                                                                                                                                                                                                                                                                                                                                                                                                                                                                                                                                                                                                                                                                                                                                                                                                                                                                                |
| Keywords:                       | INTERNAL MEDICINE, MEDICAL EDUCATION & TRAINING, STATISTICS & RESEARCH METHODS                                                                                                                                                                                                                                                                                                                                                                                                                                                                                                                                                                                                                                                                                                                                                                                                                                                    |
|                                 |                                                                                                                                                                                                                                                                                                                                                                                                                                                                                                                                                                                                                                                                                                                                                                                                                                                                                                                                   |

SCHOLARONE™  
Manuscripts





I, the Submitting Author has the right to grant and does grant on behalf of all authors of the Work (as defined in the below author licence), an exclusive licence and/or a non-exclusive licence for contributions from authors who are: i) UK Crown employees; ii) where BMJ has agreed a CC-BY licence shall apply, and/or iii) in accordance with the terms applicable for US Federal Government officers or employees acting as part of their official duties; on a worldwide, perpetual, irrevocable, royalty-free basis to BMJ Publishing Group Ltd ("BMJ") its licensees and where the relevant Journal is co-owned by BMJ to the co-owners of the Journal, to publish the Work in this journal and any other BMJ products and to exploit all rights, as set out in our [licence](#).

The Submitting Author accepts and understands that any supply made under these terms is made by BMJ to the Submitting Author unless you are acting as an employee on behalf of your employer or a postgraduate student of an affiliated institution which is paying any applicable article publishing charge ("APC") for Open Access articles. Where the Submitting Author wishes to make the Work available on an Open Access basis (and intends to pay the relevant APC), the terms of reuse of such Open Access shall be governed by a Creative Commons licence – details of these licences and which [Creative Commons](#) licence will apply to this Work are set out in our licence referred to above.

Other than as permitted in any relevant BMJ Author's Self Archiving Policies, I confirm this Work has not been accepted for publication elsewhere, is not being considered for publication elsewhere and does not duplicate material already published. I confirm all authors consent to publication of this Work and authorise the granting of this licence.



## How Do We Assess Resilience and Grit among Internal Medicine Residents at the Mayo Clinic? A Longitudinal Validity Study Including Correlations with Medical Knowledge, Professionalism, and Clinical Performance

Fares Alahdab, MD, MSc<sup>1</sup>, Andrew J Halvorsen MS<sup>2</sup>, Jayawant N Mandrekar, PhD<sup>3</sup>, Brianna E Vaa MD<sup>4</sup>, Victor M Montori, MD, MSc<sup>5,6</sup>, Colin P West MD, PhD,<sup>7,8</sup> M Hassan Murad, MD, MPH<sup>1,9</sup>, Thomas J Beckman, MD<sup>10</sup>

<sup>1</sup>Mayo Evidence-Based Practice Center, Mayo Clinic, Rochester, Minnesota.

<sup>2</sup>Office of Educational Innovations, Internal Medicine Residency Program, Mayo Clinic, Rochester, Minnesota.

<sup>3</sup>Division of Biomedical Statistics and Informatics, Department of Health Sciences Research, Mayo Clinic, Rochester, Minnesota.

Division of Community Internal Medicine, Assistant Professor of Medicine, Mayo Clinic, Rochester, Minnesota

<sup>5</sup>Knowledge and Evaluation Research Unit, Mayo Clinic, Rochester, Minnesota.

<sup>6</sup>Division of Endocrinology, Diabetes, Metabolism, and Nutrition, Mayo Clinic, Rochester, Minnesota.

<sup>7</sup>Division of General Internal Medicine, Department of Medicine, Mayo Clinic, Rochester, Minnesota

<sup>8</sup>Division of Biomedical Statistics and Informatics, Department of Health Sciences Research, Mayo Clinic, Rochester, Minnesota

<sup>9</sup>Division of Preventive, Occupational, and Aerospace Medicine, Mayo Clinic, Rochester, Minnesota.

<sup>10</sup>Division of General Internal Medicine, Department of Internal Medicine, Mayo Clinic, Rochester, Minnesota.

Corresponding author:

Fares Alahdab, MD

Mayo Evidence-Based Practice Center

Mayo Clinic, Rochester, MN

Email: [fares.alahdab@gmail.com](mailto:fares.alahdab@gmail.com)

Twitter: @fares\_alahdab

Keywords: resilience, grit, validity analysis, medical education, residency, wellbeing, burnout

Word count: 2,870

## Abstract

**Background:** There has been limited research on the positive aspects of physician wellness and to our knowledge there have been no validity studies on measures of resilience and grit among internal medicine (IM) residents.

**Objectives:** To investigate the validity of resilience (CD-RISC 10) and grit (GRIT-S) scores among IM residents at a large academic center, and assess potential associations with previously validated measures of medical knowledge, clinical performance, and professionalism.

**Methods:** We evaluated CD-RISC 10 and GRIT-S instrument scores among IM residents at the Mayo Clinic Rochester, Minnesota between July 2017 and June 2019. We analyzed dimensionality, internal consistency reliability, and criterion validity in terms of relationships between resilience and grit, with standardized measures of residents' medical knowledge (in-training examination [ITE]), clinical performance (faculty and peer evaluations and mini-clinical evaluation exercise [mini-CEX]), and professionalism/dutifulness (conference attendance and evaluation completion).

**Results:** A total of 213 out of 253 (84.2%) survey-eligible IM residents provided both CD-RISC 10 and GRIT-S survey responses. Internal consistency reliability (Cronbach alpha) was excellent for CD-RISC 10 (0.93) and GRIT-S (0.82) overall, and for the GRIT subscales of consistency of interest (0.84) and perseverance of effort (0.71). CD-RISC 10 scores were negatively associated with ITE percentile ( $\beta = -3.4$ , 95% CI: -6.2 to -0.5,  $P=0.02$ ) and mini-CEX ( $\beta = -0.2$ , 95% CI: -0.5 to -0.02,  $P=0.03$ ). GRIT-S scores were positively associated with evaluation completion percentage ( $\beta = 2.51$ , 95% CI: 0.35 to 4.67,  $P=0.02$ ) and conference attendance ( $\beta = 2.70$ , 95% CI: 0.11 to 5.29,  $P=0.04$ ).

**Conclusions:** This study revealed favorable validity evidence for CD-RISC 10 and GRIT-S among IM residents. Residents demonstrated resilience within a competitive training environment despite less favorable test performance and grittiness that was manifested by completing tasks. This initial validity study provides a foundation for further research on resilience and grit among physicians-in-training.

### Strengths and limitations of this study

- This is the first validity study of CD-RISC 10 and Grit-S scores among IM residents for resilience and grit respectively, and was completed at a large academic center in the U.S.
- This study evaluated the dimensionality, internal consistency reliability, and the criterion validity of these two measures among IM residents.

- This study provides a foundation for further research on resilience and grit among physicians in training.
- This was an observational study, which limits the ability to draw causal inferences about the relationships found.
- The analysis did not adjust for resident age, gender, or international versus U.S. medical graduation status, as they are non-modifiable variables in terms of career development and enhancing residency curricula.

For peer review only

## BACKGROUND

The prevalence of physician burnout in the US is estimated to be approximately 50% among physicians-in-training (1-4) and practicing physicians. (5-7) Notably, burnout rates are higher for physicians than other professionals even after adjusting for work hours. (8, 9) It is unclear why burnout rates are higher in certain residency programs and among particular individuals within the same clinical settings. (10) Since burnout seems to begin during medical school, (3, 11) tackling this problem at earlier stages could help mitigate its consequences later. Furthermore, although there has been much research on correlates of burnout, (12) there is limited research on the positive aspects of physician wellness and very little known about resilience and grit among internal medicine residents.

The American Psychological Association (APA) describes resilience as adapting effectively to stressors such as relationship problems, serious health issues, or workplace and financial challenges. (13) That is, resilience is the capacity to respond to adversity such that goals are achieved at minimal psychological and physical cost. Essentially, resilient individuals "bounce back" after challenges while also growing stronger. (14) Although several models of resilience have evolved over the years, (15) the dominant paradigm of resilience is dynamic, linking neurobiology, behavior, and environmental conditions. (16) Resilience is considered essential for enhancing quality of medical care, empathy for patients, and sustainability of the healthcare workforce as a whole. (14) Moreover, low resilience may impair brain function, even resulting in posttraumatic stress disorder (PTSD), depression, and other psychiatric disorders. (17) Yet, most people do not develop such conditions after experiencing difficult life events and are thus considered to be "resilient". Resilience as a successful adaptation relies on effective responses to environmental challenges and, ultimately, resistance to the harmful effects of stress. (18) Therefore, a greater understanding of the factors that promote resilience is critical. (19)

The most widely used assessment of resilience is the Connor-Davidson Resilience Scale (CD-RISC). Use of the CD-RISC has shown that resilience is modifiable and can be improved. A shorter version of this scale, which has similar psychometric properties, is the CD-RISC 10. (20) Evidence based on the use of this assessment measure suggests that resilience can be promoted in healthcare workplaces, (21) although research on physicians is scarce.

Grit is defined as the perseverance and passion for long-term goals. (22-24) Rather than avoidance and shying away, grit means working towards achieving specific outcomes despite difficulty, failure, or adversity. (25) Individuals who remain focused on a goal or task and see it through to satisfactory completion would be described as "gritty". (26) Grit is a predictor of success in stressful, high-achievement fields including,

1  
2  
3 but not limited to, surgical residency, (27-29) emergency residency,(30) military, (23)  
4 and pharmacy. (31) The original Grit Scale (Grit-O) consists of 12 items, each rated on  
5 a 5-point scale, (1-5) classified under two main domains: 1) consistency of interest, and  
6 2) perseverance of effort, with six elements each. (22) Subsequently, an abbreviated (8-  
7 question) scale with improved psychometric properties was developed by the same  
8 investigators to measure trait-level perseverance and passion for long-term goals (Grit-  
9 S), (23)  
10  
11  
12

13 Although there has been ample research on relationships between burnout and various  
14 aspects of professionalism and clinical performance among resident physicians, (32-36)  
15 to our knowledge the CD-RISC 10 and Grit-S scales have not been previously validated  
16 in U.S. internal medicine residents. Furthermore, there remains the need for further  
17 research on positive aspects of physician wellness – such as resilience and grit – which  
18 may serve to counterbalance burnout.  
19  
20  
21

22 In this study we assessed the validity of CD-RISC 10 and Grit-S scores among internal  
23 medicine (IM) residents at a large academic medical center. Additionally, we examined  
24 associations between resident resilience and grit based on CD-RISC 10 and Grit-S  
25 scores, respectively, with previously standardized measures of medical knowledge (the  
26 in-training examination), professionalism (dutifulness based on conference attendance  
27 and evaluation completion), and clinical performance (validated, multisource, clinical  
28 performance evaluations).  
29  
30  
31

## 32 **METHODS**

### 33 **Study Design and Sample**

34  
35 This was a longitudinal cohort study of IM residents training at Mayo Clinic Rochester  
36 between July 2017 and June 2019 who were invited to participate in the Mayo Internal  
37 Medicine Well-Being (IMWELL) Study. We used existing survey data from the IMWELL  
38 study in addition to administrative data collected routinely on IM residents at Mayo Clinic  
39 in Rochester, MN. This study was deemed exempt by the Mayo Institutional Review  
40 Board.  
41  
42  
43  
44

### 45 **The Mayo IMWELL Study**

46  
47 The prospective, longitudinal, Mayo IMWELL study was initiated in 2003 to evaluate IM  
48 residents' burnout, quality of life, and empathy, along with other measures of well-being  
49 (37-40). Enrollment is voluntary and is offered during the orientation of all new interns  
50 (categorical and preliminary) in the IM residency program. For the time frame between  
51 July 2017 to June 2019, 253 residents were eligible to be enrolled as participants and  
52 were surveyed twice per year. An additional survey was sent each spring to graduating  
53 categorical residents. Identities of participants were anonymized during data collection  
54  
55  
56  
57

1  
2  
3 and before analysis using numerical codes. The CD-RISC 10 and Grit-S instruments  
4 were added to the IMWELL study surveys starting July 2017. The CD-RISC 10 and Grit-  
5 S scores from the IMWELL study for each resident were merged with each resident's  
6 residency performance metrics during the subsequent 6 months (July to December or  
7 January to June) on the other relevant instruments described below.  
8  
9

## 10 **Validity Evidence**

11  
12 The validity argument for this study was based on a modern approach to validity which  
13 states that all validity is construct validity, and that validity evidence is gathered from the  
14 categories of content, internal structure, relations to other variables, response process,  
15 and consequences. (41) Content refers to relationships between an assessment's  
16 wording and the construct that it purportedly measures. Internal structure refers to the  
17 degree to which instrument items fit the underlying construct and is often reported in  
18 terms of dimensionality and reliability. Relations to other variables evidence is the  
19 relationship between scores and other variables relevant to the construct being  
20 measured, such that the relationships may be positive or negative depending on the  
21 constructs being measured. (42) Notably, research has indicated that commonly  
22 reported categories of validity evidence among education research studies come from  
23 the categories of content, internal structure, and relations to other variables. (42)  
24  
25  
26  
27  
28

## 29 **Instruments and Scales Used**

30  
31 Short Grit Scale (Grit-S): An 8-item assessment, each rated on a 5-point scale (1=Not  
32 like me at all, 2=Not much like me, 3=Somewhat like me, 4=Mostly like me, 5=Very  
33 much like me), covering two factors, (23) that measures trait-level perseverance and  
34 passion for long-term goals. It has 4 fewer items than the original grit scale (Grit-O) (22)  
35 with improved psychometric properties. The Short Grit (Grit-S) scale is a brief version of  
36 the original 12-item Grit-O scale. Previous studies have shown that it has predictive  
37 validity, consensual validity, and test-retest stability. Factor analysis, and later  
38 confirmatory factor analysis, has supported a 2-factor structure of the scale reflecting  
39 "consistency of interest" and "perseverance of effort". Both factors showed adequate  
40 internal consistency reliability. (23)  
41  
42  
43  
44

45  
46 10 item Connor-Davidson Resilience Scale (CD-RISC 10): An assessment consisting of  
47 10 items, rated on a 5-point scales (0=Not true at all, 1=Rarely true, 2=Sometimes true,  
48 3=Often true, 4=True nearly all of the time), with higher scores indicating greater  
49 resilience. (43) It has ability to distinguish between those with greater and lesser  
50 resilience levels, and to demonstrate that resilience is modifiable and can be improved.  
51 The reliability and validity of the Connor-Davidson Resilience scale (CD-RISC) were  
52 previously evaluated and performed well in other settings. Factor analysis revealed five  
53 factors for the CD-RISC scale. (43) CD-RISC 10 is a 10-item version of this scale with  
54  
55  
56  
57



1  
2  
3 good internal consistency and evidence to support construct validity. (20) Further  
4 validation studies have shown excellent performance of the CD-RISC 10 among the  
5 general population (44) and trainees in the United States Air Force. (45)  
6  
7

8 Knowledge measures: This included In-Training Exam (ITE) score percentiles. The ITE  
9 is administered to all U.S. IM residents annually. Residents in this study were  
10 administered the ITE annually each fall. Validity of the ITE scores has been established  
11 in several studies. (46, 47)  
12  
13

14 Professionalism and dutifulness measures: This included conference attendance and  
15 evaluation completion, which were validated in our previous studies of residents at the  
16 Mayo Clinic. (48) Conference attendance was assessed using in-person card-swipe  
17 data. Evaluation completion percentage was determined from the MedHub<sup>®</sup> residency  
18 evaluation system for our study's time frame.  
19  
20

21 Clinical performance: We selected clinical performance measures as association  
22 variables for this study, because we believed that standardized assessments of  
23 performance are among the most rigorous challenges for testing residents' resilience  
24 and grit. Clinical performance was determined by faculty and peer evaluations and the  
25 standardized Mini Clinical Evaluation Examination (Mini-CEX). (49, 50) The Mini-CEX  
26 evaluates core clinical skills by trainees, namely medical interviewing, physical  
27 examination, informed decision-making/counseling, and clinical judgment/reasoning.  
28 The Mini-CEX has demonstrated validity evidence among internal medicine residents.  
29 (49-52) The mini-CEX used at Mayo Clinic Rochester incorporates a 5-point scale.  
30 Multisource assessments of residents' clinical performance at Mayo Clinic Rochester  
31 are completed by faculty, peers and senior medical residents. Items within these clinical  
32 performance assessments have shown multi-dimensionality and excellent internal  
33 consistency reliability. (53, 54) The clinical performance evaluations (peer evaluations,  
34 faculty evaluations, and mini-CEX ratings) are administered by the residency evaluation  
35 platform, MedHub<sup>®</sup>. Aggregate reports of evaluations can be obtained by timeframe of  
36 interest, with all assessments standardized to a score in the range of 0-10.  
37  
38  
39  
40  
41  
42  
43

## 44 **Data Analysis**

45  
46 Participants' demographics were summarized using descriptive statistics. Continuous  
47 variables such as age were summarized as mean (standard deviation). Nominal  
48 variables, such as gender, were reported using a count (percent of total). A threshold of  
49  $p < 0.05$  was used to determine statistical significance. Statistical analyses were  
50 conducted using SAS version 9.4 (SAS Institute, Inc., Cary, NC).  
51  
52

## 53 **Validation of the CD-RISC 10 and Grit-S Scales among Internal Medicine** 54 **Residents**

55  
56  
57

1  
2  
3 It has been recommended to re-examine the validity of assessments when applying  
4 them to specific contexts and educational settings. (55) Therefore, we evaluated the  
5 internal structure validity of the CD-RISC 10 and Grit-S for this study as follows:  
6  
7

- 8 1. Factor analyses of the CD-RISC 10 & Grit-S instruments were done using  
9 principal components analysis with a minimum eigenvalue of 1 criterion. An  
10 orthogonal Varimax rotation was used to estimate item loadings. Items with factor  
11 loadings of 0.48 or more were retained. (56) Internal consistency reliabilities for  
12 items comprising each factor and overall were determined using Cronbach alpha,  
13 where alpha >0.7 was considered acceptable. (56) Scale values were reversed  
14 for the 'Consistency of Interest' factor items of Grit-S (1, 3, 5, and 6) so that  
15 1=very much like me, 2=mostly like me, 3=somewhat like me, 4=not much like  
16 me, 5=not like me at all, so that higher item scores reflect increased 'Grit'.  
17  
18  
19  
20
- 21 2. Criterion validity (relations to other variables): Unadjusted bivariate associative  
22 analyses used generalized linear models with normal response distributions and  
23 identity link functions estimated via generalized estimating equations (GEEs) with  
24 an exchangeable covariance matrix. The CD-RISC 10 and Grit-S scores were  
25 treated as the explanatory variables, and residency performance in the various  
26 metrics during the subsequent 6 months were the outcome variables.  
27  
28  
29

### 30 **Patient and public involvement:**

31  
32 Patients and the public were not involved in this research study.  
33

## 34 **RESULTS**

### 35 **Sample Characteristics**

36  
37 From a total of 253 eligible IM residents training at Mayo Clinic Rochester between July  
38 2017 and June 2019, 213 (84.2%) completed at least 1 IMWELL survey, resulting in  
39 468 completed CD-RISC 10 and 472 Grit-S surveys from a total of 801 possible  
40 surveys. A total of 461 IMWELL surveys included complete responses for both scales.  
41 There were 193 ITE percentiles and 358 mini-CEX evaluations available for the same  
42 time period. The demographic characteristics of the participants are shown in Table 1.  
43  
44  
45  
46

### 47 **Medical Knowledge, Clinical Performance, and Professionalism Metrics**

48  
49 The ITE score percentiles among residents in our study (N=193) ranged from 18-100,  
50 with a mean (SD) of 83.3 (15.5). Clinical performance, as reflected by faculty  
51 evaluations (N=429), peer evaluations (N=362), and mini-CEX (N=358) showed mean  
52 (SD) scores of 7.84 (0.69), 8.09 (0.83), and 8.19 (1.59), respectively. Performance  
53 measure summaries are shown in Table 2.  
54  
55  
56  
57



## Validity Analyses of the CD-RISC 10 and GRIT-S Instruments

Regarding the internal structure validity evidence for the scales among IM residents, the CD-RISC 10 index demonstrated a single dimension of resilience while the GRIT-S index demonstrated two dimensions of grittiness. The internal consistency reliability for both scales overall, and for the GRIT subscales, was high (Cronbach  $\alpha$ 's>0.7, Tables 3 and 4).

The 468 completed CD-RISC 10 scales showed mean scores for individual items ranging from 2.74 (not easily discouraged by failure) to 3.34 (can achieve goals despite obstacles) on the 0-4 scale [Table 3]. The overall mean summed (SD) CD-RISC score was 31.5 (6.1). The 472 completed GRIT-S scales showed individual-item mean scores ranging from 2.99 (new ideas and projects sometimes distract me from previous ones) to 4.48 (I am a hard worker) on the 1-5 scale [Table 4]. The overall mean (SD) GRIT-S score was 3.72 (0.59).

Regarding relations to other variables (i.e., criterion) validity evidence, the CD-RISC 10 overall summed scores correlated negatively with medical knowledge acquisition as measured by ITE score percentile ( $\beta = -0.34$ , 95% CI: -0.62 to -0.05,  $P=0.02$ ). The CD-RISC 10 overall summed scores also correlated negatively with clinical performance as measured by the mini-CEX ( $\beta = -0.02$ , 95% CI: -0.05 to -0.002,  $P=0.03$ ) (Table 5).

The GRIT-S overall mean score correlated positively with evaluation completion percentage ( $\beta = 2.51$ , 95% CI: 0.35 to 4.67,  $P=0.02$ ) and in-person conference attendance ( $\beta = 2.70$ , 95% CI: 0.11 to 5.29,  $P=0.04$ ) (Table 5), which are measures of the dutifulness aspect of professionalism.

## DISCUSSION

The CD-RISC 10 and GRIT-S instruments have strong validity in measuring resilience and grit in several populations (20, 23, 45, 57) and there have been studies of grit in surgical (28, 29, 58) and emergency medicine residents. (30) However, to our knowledge, this is the first validity study of the CD-RISC 10 and GRIT-S among IM residents. Both instruments showed excellent internal consistency reliability, statistically significant associations with previously validated measures of resident physician performance, and dimensionality characteristics that are consistent with previous research.

We identified a negative association between residents' CD-RISC 10 scores and measures of clinical performance (mini-CEX) and medical knowledge (ITE). This finding might reflect resilient residents' abilities to thrive within a high-pressured IM training environment, despite performing less favorably on standardized assessments within this setting. In other words, whether a resident thrives was not determined by their

1  
2  
3 performance on one of these measures, but rather, on their overall standing within our  
4 rigorous training environment. This finding may be supported by the residents' highest  
5 score on the item, "achieve goals despite obstacles." We also identified a positive  
6 association between GRIT-S scores and evaluation completion, which is a dutifulness  
7 aspect of professionalism. (22, 59) These findings suggest that, as expected, residents  
8 with grittiness tend to finish tasks. Additionally, these findings correspond to residents'  
9 highest score on the item, "I am a hard worker." Overall, our research should inform  
10 future interventions to improve resident performance and well-being by using the CD-  
11 RISC 10 and GRIT-S as roadmaps for curricular interventions.  
12  
13  
14  
15

16 Compared to the general U.S. population included in the original validation studies, (43,  
17 57, 60) the overall mean (SD) resilience score in our sample was comparable [31.5  
18 (6.1) versus 32.1 (5.8) and 31.8 (5.4)]. However, compared to the reference group  
19 aged 25-34 years in the original validation study, the overall mean (SD) GRIT-S score in  
20 our sample was higher [3.72 (0.59) versus 3.2 (0.7)]. (23) Our study participants noted  
21 strong perseverance as reflected by their highest GRIT-S score on the item "I am a hard  
22 worker." Additionally, the dimensionalities for the GRIT-S and CD-RISC 10 scales in our  
23 study were consistent with findings from research in different populations. (61, 62)  
24 However, despite having higher grit and comparable resilience as compared to the  
25 general population, burnout rates among physicians and physicians-in-training appear  
26 to be greater than that of the U.S. working population. (3, 8) This suggests that the  
27 medical profession selects gritty and resilient individuals, yet still manages to burn them  
28 out. Furthermore, research shows that wellbeing indicators are highest upon  
29 matriculation to medical school, and subsequently wane throughout medical training.  
30 (63) Consequently, future research should examine the interactions between burnout,  
31 empathy, resilience, and grit.  
32  
33  
34  
35  
36  
37

38 This study has several limitations. First, it was observational, which constrains the ability  
39 to draw causal inferences about the relationships that were identified. Second, the  
40 analysis did not adjust for age, gender, and international versus U.S. medical  
41 graduation status. Nonetheless, these are non-modifiable variables that would not  
42 facilitate efforts at professional development or enhancing residency curricula. Third,  
43 this study involved IM residents at a large academic medical center, which may limit  
44 generalization to some other specialties and settings. Fourth, although we implicate  
45 potential, counterbalancing interactions between grit and wellness with burnout, this  
46 remains speculative until there is further research that actually examines interactions  
47 between performance on these scales among internal medicine residents. Fifth,  
48 residents' self-selection to participate in the study introduces the potential for selection  
49 and response biases, though it is noteworthy that the response/participation rate for this  
50 study was high.  
51  
52  
53  
54  
55  
56  
57  
58  
59  
60

1  
2  
3 Resilience and grit may lessen burnout, yet these relationships remain unclear among  
4 physicians in training. Thus, research on resilience and grit could assist interventions to  
5 mitigate physician burnout (64, 65) and provide a deeper understanding of dynamics  
6 between the issues at play. (66) Findings from this study support use of the CD-RISC  
7 10 and GRIT-S among internal medicine residents and should serve as a foundation for  
8 future research on resilience and grit in medical learners. This research should examine  
9 associations among IM residents between CD-RISC 10 and GRIT-S, with validated  
10 measures of burnout and well-being. It is noteworthy that burnout is prevalent within  
11 current medical education and training systems and may be an indicator of  
12 organizational health. (67, 68) Therefore, improved understanding of resilience and grit  
13 may enhance graduate medical education curricula (36, 69-72) and the wellbeing of  
14 physicians.

15  
16 There have been ample investigations on physician burnout and depression, yet there  
17 has been less research on positive aspects of physician wellness including resilience  
18 and grit among internal medicine residents. Especially during this era of the COVID  
19 pandemic, it is necessary to better understand characteristics of physicians that allow  
20 them to surmount adversity and thrive. Since high resiliency and grit have been  
21 correlated with positive attributes in other populations, we are hopeful that further study  
22 of these traits in residents' will help to improve their quality of life. (27, 58, 73)

#### 23 24 25 **Author contributions:**

26 Idea conception: TJB, FA, CPW, VMM

27 Study design and methodology: FA, TJB, AJH

28 Data management and analysis: AJH, JNM

29 Interpretation of the data: FA, AJH, TJB, MHM, BEV

30 Manuscript drafting: FA

31 Supervision: TJB

32 Revising, editing, and final approval of manuscript: all authors.

#### 33 34 35 **Disclosure:**

36 No conflicts of interest, financial or other, to declare by any of the authors.

37 Dissemination of study results to study participants is not applicable.

38 No additional data available.

39 The author(s) received no financial support for the research, authorship, and/or  
40 publication of this article.

1  
2  
3  
4  
5  
6  
7  
8  
9  
10  
11  
12  
13  
14  
15  
16  
17  
18  
19  
20  
21  
22  
23  
24  
25  
26  
27  
28  
29  
30  
31  
32  
33  
34  
35  
36  
37  
38  
39  
40  
41  
42  
43  
44  
45  
46  
47  
48  
49  
50  
51  
52  
53  
54  
55  
56  
57  
58  
59  
60

For peer review only

## REFERENCES

1. Dyrbye L, Shanafelt T. A narrative review on burnout experienced by medical students and residents. *Med Educ*. 2016;50(1):132-49.
2. Dyrbye LN, Thomas MR, Massie FS, Power DV, Eacker A, Harper W, et al. Burnout and suicidal ideation among U.S. medical students. *Ann Intern Med*. 2008;149(5):334-41.
3. Dyrbye LN, West CP, Satele D, Boone S, Tan L, Sloan J, et al. Burnout among U.S. medical students, residents, and early career physicians relative to the general U.S. population. *Acad Med*. 2014;89(3):443-51.
4. West CP, Shanafelt TD, Kolars JC. Quality of life, burnout, educational debt, and medical knowledge among internal medicine residents. *JAMA*. 2011;306(9):952-60.
5. Linzer M, Visser MR, Oort FJ, Smets EM, McMurray JE, de Haes HC, et al. Predicting and preventing physician burnout: results from the United States and the Netherlands. *Am J Med*. 2001;111(2):170-5.
6. Allegra CJ, Hall R, Yothers G. Prevalence of burnout in the u.s. Oncology community: results of a 2003 survey. *J Oncol Pract*. 2005;1(4):140-7.
7. Shanafelt TD, Boone S, Tan L, Dyrbye LN, Sotile W, Satele D, et al. Burnout and satisfaction with work-life balance among US physicians relative to the general US population. *Arch Intern Med*. 2012;172(18):1377-85.
8. Shanafelt TD, Hasan O, Dyrbye LN, Sinsky C, Satele D, Sloan J, et al. Changes in Burnout and Satisfaction With Work-Life Balance in Physicians and the General US Working Population Between 2011 and 2014. *Mayo Clin Proc*. 2015;90(12):1600-13.
9. Shanafelt TD, West CP, Sinsky C, Trockel M, Tutty M, Satele DV, et al. Changes in Burnout and Satisfaction With Work-Life Integration in Physicians and the General US Working Population Between 2011 and 2017. *Mayo Clin Proc*. 2019;94(9):1681-94.
10. Quinn MA, Bazari H, Ripp J, Block L, Chretien KC, Fried ED, et al. A Roadmap for Research on Resident Well-Being. *Am J Med*. 2018;131(3):323-8.
11. Brazeau CM, Shanafelt T, Durning SJ, Massie FS, Eacker A, Moutier C, et al. Distress among matriculating medical students relative to the general population. *Acad Med*. 2014;89(11):1520-5.
12. Williams ES, Manwell LB, Konrad TR, Linzer M. The relationship of organizational culture, stress, satisfaction, and burnout with physician-reported error and suboptimal patient care: results from the MEMO study. *Health Care Manage Rev*. 2007;32(3):203-12.
13. Lillian Comas-Diaz P, Suniya S, Luthar, PhD, Salvatore R, Maddi, PhD, H. Katherine (Kit) O'Neill, PhD, Karen W. Saakvitne, PhD, Richard Glenn Tedeschi, PhD. *The Road to Resilience*. <https://www.apa.org/helpcenter/road-resilience.aspx>: American Psychological Association.
14. Epstein RM, Krasner MS. Physician resilience: what it means, why it matters, and how to promote it. *Acad Med*. 2013;88(3):301-3.
15. Chmitorz A, Kunzler A, Helmreich I, Tuscher O, Kalisch R, Kubiak T, et al. Intervention studies to foster resilience - A systematic review and proposal for a resilience framework in future intervention studies. *Clin Psychol Rev*. 2018;59:78-100.
16. Sapienza JK, Masten AS. Understanding and promoting resilience in children and youth. *Curr Opin Psychiatry*. 2011;24(4):267-73.
17. Patel RS, Bachu R, Adikey A, Malik M, Shah M. Factors Related to Physician Burnout and Its Consequences: A Review. *Behav Sci (Basel)*. 2018;8(11).
18. Russo SJ, Murrough JW, Han MH, Charney DS, Nestler EJ. Neurobiology of resilience. *Nat Neurosci*. 2012;15(11):1475-84.
19. Wu G, Feder A, Cohen H, Kim JJ, Calderon S, Charney DS, et al. Understanding resilience. *Front Behav Neurosci*. 2013;7:10.

20. Campbell-Sills L, Stein MB. Psychometric analysis and refinement of the Connor-davidson Resilience Scale (CD-RISC): Validation of a 10-item measure of resilience. *J Trauma Stress*. 2007;20(6):1019-28.
21. Jackson D FA, Edenborough M. Personal resilience as a strategy for surviving and thriving in the face of workplace adversity: a literature review. *J Adv Nurs*. 2007;60(1):1-9.
22. Duckworth AL, Peterson C, Matthews MD, Kelly DR. Grit: perseverance and passion for long-term goals. *J Pers Soc Psychol*. 2007;92(6):1087-101.
23. Duckworth AL, Quinn PD. Development and validation of the short grit scale (grit-s). *J Pers Assess*. 2009;91(2):166-74.
24. Robertson-Kraft C, Duckworth AL. True Grit: Trait-level Perseverance and Passion for Long-term Goals Predicts Effectiveness and Retention among Novice Teachers. *Teach Coll Rec (1970)*. 2014;116(3).
25. Eskreis-Winkler L, Shulman EP, Beal SA, Duckworth AL. The grit effect: predicting retention in the military, the workplace, school and marriage. *Front Psychol*. 2014;5:36.
26. Silvia PJ, Eddington KM, Beaty RE, Nusbaum EC, Kwapil TR. Gritty people try harder: grit and effort-related cardiac autonomic activity during an active coping challenge. *Int J Psychophysiol*. 2013;88(2):200-5.
27. Burkhart RA, Tholey RM, Guinto D, Yeo CJ, Chojnacki KA. Grit: a marker of residents at risk for attrition? *Surgery*. 2014;155(6):1014-22.
28. Salles A, Lin D, Liebert C, Esquivel M, Lau JN, Greco RS, et al. Grit as a predictor of risk of attrition in surgical residency. *Am J Surg*. 2017;213(2):288-91.
29. Samuelsen BT, Desai VS, Turner NS, Kelly AM, Grawe B, Camp CL. Generational Differences in Grit, Self-Control, and Conscientiousness Among Orthopaedic Surgeons: From Millennials to Baby Boomers. *J Bone Joint Surg Am*. 2019;101(14):e71.
30. Kalantari A. Faculty Assessment of Emergency Medicine Resident Grit: A Multicentered Study. *AEM Educ Train*. 2019;3(1):100.
31. Hammond DA. Grit: An important characteristic in learners. *Curr Pharm Teach Learn*. 2017;9(1):1-3.
32. McClafferty H, Brooks AJ, Chen MK, Brenner M, Brown M, Esparham A, et al. Pediatric Integrative Medicine in Residency Program: Relationship between Lifestyle Behaviors and Burnout and Wellbeing Measures in First-Year Residents. *Children (Basel)*. 2018;5(4).
33. Panagioti M, Geraghty K, Johnson J, Zhou A, Panagopoulou E, Chew-Graham C, et al. Association Between Physician Burnout and Patient Safety, Professionalism, and Patient Satisfaction: A Systematic Review and Meta-analysis. *JAMA Intern Med*. 2018;178(10):1317-30.
34. Baer TE, Feraco AM, Tuysuzoglu Sagalowsky S, Williams D, Litman HJ, Vinci RJ. Pediatric Resident Burnout and Attitudes Toward Patients. *Pediatrics*. 2017;139(3).
35. Brown R, Dunn S, Byrnes K, Morris R, Heinrich P, Shaw J. Doctors' stress responses and poor communication performance in simulated bad-news consultations. *Acad Med*. 2009;84(11):1595-602.
36. Fahrenkopf AM, Sectish TC, Barger LK, Sharek PJ, Lewin D, Chiang VW, et al. Rates of medication errors among depressed and burnt out residents: prospective cohort study. *BMJ*. 2008;336(7642):488-91.
37. West CP, Dyrbye LN, Sloan JA, Shanafelt TD. Single item measures of emotional exhaustion and depersonalization are useful for assessing burnout in medical professionals. *J Gen Intern Med*. 2009;24(12):1318-21.
38. West CP, Tan AD, Habermann TM, Sloan JA, Shanafelt TD. Association of resident fatigue and distress with perceived medical errors. *JAMA*. 2009;302(12):1294-300.
39. Beckman TJ, Reed DA, Shanafelt TD, West CP. Impact of resident well-being and empathy on assessments of faculty physicians. *J Gen Intern Med*. 2010;25(1):52-6.



40. Beckman TJ, Reed DA, Shanafelt TD, West CP. Resident physician well-being and assessments of their knowledge and clinical performance. *J Gen Intern Med.* 2012;27(3):325-30.
41. Cook DA, Beckman TJ. Current concepts in validity and reliability for psychometric instruments: theory and application. *Am J Med.* 2006;119(2):166 e7-16.
42. Beckman TJ, Cook DA, Mandrekar JN. What is the validity evidence for assessments of clinical teaching? *J Gen Intern Med.* 2005;20(12):1159-64.
43. Connor KM, Davidson JR. Development of a new resilience scale: the Connor-Davidson Resilience Scale (CD-RISC). *Depress Anxiety.* 2003;18(2):76-82.
44. Ni MY, Li TK, Yu NX, Pang H, Chan BH, Leung GM, et al. Normative data and psychometric properties of the Connor-Davidson Resilience Scale (CD-RISC) and the abbreviated version (CD-RISC2) among the general population in Hong Kong. *Qual Life Res.* 2016;25(1):111-6.
45. Bezdjian S, Schneider KG, Burchett D, Baker MT, Garb HN. Resilience in the United States Air Force: Psychometric properties of the Connor-Davidson Resilience Scale (CD-RISC). *Psychol Assess.* 2017;29(5):479-85.
46. Garibaldi RA, Trontell MC, Waxman H, Holbrook JH, Kanya DT, Khoshbin S, et al. The in-training examination in internal medicine. *Ann Intern Med.* 1994;121(2):117-23.
47. Garibaldi RA, Subhiyah R, Moore ME, Waxman H. The In-Training Examination in Internal Medicine: an analysis of resident performance over time. *Ann Intern Med.* 2002;137(6):505-10.
48. Reed DA, West CP, Mueller PS, Ficalora RD, Engstler GJ, Beckman TJ. Behaviors of highly professional resident physicians. *JAMA.* 2008;300(11):1326-33.
49. Cook DA, Beckman TJ, Mandrekar JN, Pankratz VS. Internal structure of mini-CEX scores for internal medicine residents: factor analysis and generalizability. *Adv Health Sci Educ Theory Pract.* 2010;15(5):633-45.
50. Norcini JJ, Blank LL, Duffy FD, Fortna GS. The mini-CEX: a method for assessing clinical skills. *Ann Intern Med.* 2003;138(6):476-81.
51. Cook DA, Beckman TJ. Does scale length matter? A comparison of nine- versus five-point rating scales for the mini-CEX. *Adv Health Sci Educ Theory Pract.* 2009;14(5):655-64.
52. Hatala R, Ainslie M, Kassen BO, Mackie I, Roberts JM. Assessing the mini-Clinical Evaluation Exercise in comparison to a national specialty examination. *Med Educ.* 2006;40(10):950-6.
53. Beckman TJ, Mandrekar JN, Engstler GJ, Ficalora RD. Determining reliability of clinical assessment scores in real time. *Teach Learn Med.* 2009;21(3):188-94.
54. Post JA, Wittich CM, Thomas KG, Dupras DM, Halvorsen AJ, Mandrekar JN, et al. Rating the Quality of Entrustable Professional Activities: Content Validation and Associations with the Clinical Context. *J Gen Intern Med.* 2016;31(5):518-23.
55. Beckman TJ, Cook DA, Mandrekar JN. Factor instability of clinical teaching assessment scores among general internists and cardiologists. *Med Educ.* 2006;40(12):1209-16.
56. DeVellis RF. *Scale Development: Theory and Applications.* Newbury Park CA: Sage Publications, Inc.; 1991.
57. JRT D. Connor-Davidson Resilience Scale (CD-RISC) Manual. Unpublished. accessible at [www.cd-risc.com](http://www.cd-risc.com); 2018.
58. Salles A, Cohen GL, Mueller CM. The relationship between grit and resident well-being. *Am J Surg.* 2014;207(2):251-4.
59. Miller-Matero LR, Martinez S, MacLean L, Yaremchuk K, Ko AB. Grit: A predictor of medical student performance. *Educ Health (Abingdon).* 2018;31(2):109-13.
60. Campbell-Sills L, Forde DR, Stein MB. Demographic and childhood environmental predictors of resilience in a community sample. *J Psychiatr Res.* 2009;43(12):1007-12.
61. Li C. THE SHOR THE SHORT GRIT SCALE: A DIMENSION T SCALE: A DIMENSIONALITY ANALYSIS. Theses and Dissertations--Educational, School, and Counseling Psychology: University of Kentucky; 2015.

- 1  
2  
3 62. Daniel F.Gucciardi BJ, Tristan J.Coulter, Clifford J.Mallett. The Connor-Davidson Resilience Scale  
4 (CD-RISC): Dimensionality and age-related measurement invariance with Australian cricketers.  
5 *Psychology of Sport and Exercise*. 2011;12(4):423-33.  
6  
7 63. Hansell MW, Ungerleider RM, Brooks CA, Knudson MP, Kirk JK, Ungerleider JD. Temporal Trends  
8 in Medical Student Burnout. *Fam Med*. 2019;51(5):399-404.  
9  
10 64. West CP, Dyrbye LN, Erwin PJ, Shanafelt TD. Interventions to prevent and reduce physician  
11 burnout: a systematic review and meta-analysis. *Lancet*. 2016;388(10057):2272-81.  
12  
13 65. Panagioti M, Panagopoulou E, Bower P, Lewith G, Kontopantelis E, Chew-Graham C, et al.  
14 Controlled Interventions to Reduce Burnout in Physicians: A Systematic Review and Meta-analysis. *JAMA*  
15 *Intern Med*. 2017;177(2):195-205.  
16  
17 66. Lotte N. Dyrbye TDS, Christine A. Sinsky, Pamela F. Cipriano, Jay Bhatt, Alexander Ommaya, Colin  
18 P. West, David Meyers. Burnout Among Health Care Professionals: A Call to Explore and Address This  
19 Underrecognized Threat to Safe, High-Quality Care. National Academy of Medicine; 2017.  
20  
21 67. Montgomery A. The inevitability of physician burnout: Implications for interventions. *Burnout*  
22 *Research*. 2014;1(1):50-6.  
23  
24 68. Wallace JE, Lemaire JB, Ghali WA. Physician wellness: a missing quality indicator. *Lancet*.  
25 2009;374(9702):1714-21.  
26  
27 69. Shanafelt TD, West C, Zhao X, Novotny P, Kolars J, Habermann T, et al. Relationship between  
28 increased personal well-being and enhanced empathy among internal medicine residents. *J Gen Intern*  
29 *Med*. 2005;20(7):559-64.  
30  
31 70. Firth-Cozens J, Greenhalgh J. Doctors' perceptions of the links between stress and lowered  
32 clinical care. *Soc Sci Med*. 1997;44(7):1017-22.  
33  
34 71. Shanafelt TD, Bradley KA, Wipf JE, Back AL. Burnout and self-reported patient care in an internal  
35 medicine residency program. *Ann Intern Med*. 2002;136(5):358-67.  
36  
37 72. West CP, Huschka MM, Novotny PJ, Sloan JA, Kolars JC, Habermann TM, et al. Association of  
38 perceived medical errors with resident distress and empathy: a prospective longitudinal study. *JAMA*.  
39 2006;296(9):1071-8.  
40  
41 73. Halliday L, Walker A, Vig S, Hines J, Brecknell J. Grit and burnout in UK doctors: a cross-sectional  
42 study across specialties and stages of training. *Postgrad Med J*. 2017;93(1101):389-94.  
43  
44  
45  
46  
47  
48  
49  
50  
51  
52  
53  
54  
55  
56  
57  
58  
59  
60



**Table 1. Baseline Characteristics of Internal Medicine Resident Physicians**

| Variable          | Level       | Total (N=253) | ≥1 Survey (N=213) | No Survey (N=40) | P value |
|-------------------|-------------|---------------|-------------------|------------------|---------|
| Sex               | Male        | 165 (65.2%)   | 137 (64.3%)       | 28 (70.0%)       | 0.59    |
|                   | Female      | 88 (34.8%)    | 76 (35.7%)        | 12 (30%)         |         |
| Program           | Categorical | 196 (77.5%)   | 170 (79.8%)       | 26 (65.0%)       | 0.06    |
|                   | Preliminary | 57 (22.5%)    | 43 (20.2%)        | 14 (35.0%)       |         |
| Match Year        | 2015        | 50 (19.8%)    | 40 (18.8%)        | 10 (25.0%)       | 0.40    |
|                   | 2016        | 47 (18.6%)    | 39 (18.3%)        | 8 (20.0%)        |         |
|                   | 2017        | 78 (30.8%)    | 70 (32.9%)        | 8 (20.0%)        |         |
|                   | 2018        | 78 (30.8%)    | 64 (30.1%)        | 14 (35.0%)       |         |
| Age               | Mean (SD)   | 27.72 (2.62)  | 27.69 (2.66)      | 27.90 (2.43)     | 0.62    |
| Possible Surveys  | Mean (SD)   | 3.17 (1.17)   | 3.20 (1.17)       | 3.00 (1.18)      | 0.33    |
| Completed Surveys | Mean (SD)   | -             | 2.16 (1.08)       | -                | -       |

Notes: Baseline Characteristics of 253 Survey Eligible IM Resident Physicians from July 2017 Through June 2019 (213 [84.2%] IM Resident Physicians Completed 461 [57.6%] CD-RISC 10 / Grit-S Surveys out of 801 possible)

**Table 2. Medical Knowledge, Professionalism, and Clinical Performance Measures for 210 IM Resident Physicians Providing Data from July 2017 to June 2019 (N=429)**

| Variable             | Metric (scale)                | n (Eligible) | n (Responses) | Mean (SD)   | Range     |
|----------------------|-------------------------------|--------------|---------------|-------------|-----------|
| Medical Knowledge    | IM-ITE, percentile            | 353          | 193           | 83.3 (15.5) | 18-100    |
| Professionalism      | Conference Attendance, number | 705          | 429           | 53.8 (14.3) | 6-95      |
|                      | Evaluation Completion, %      | 705          | 429           | 77.3 (11.5) | 22-100    |
| Clinical Performance | Faculty Evaluations (0-10)    | 705          | 429           | 7.84 (0.69) | 4.49-9.37 |
|                      | Peer Evaluations (0-10)       | 705          | 362           | 8.09 (0.83) | 4.13-10   |
|                      | Mini-CEX (0-10)               | 705          | 358           | 8.19 (1.59) | 4.00-10   |

**Table 3. IM Resident Physicians' Mean Scores on, Factor Loadings of, and Internal Consistency Reliability of the CD-RISC 10 (N=468)**

| Item                                             | Mean Score (SD) | Item Loading | Cronbach $\alpha$ |
|--------------------------------------------------|-----------------|--------------|-------------------|
| <b>CD-RISC 10 overall (0-40)</b>                 | 31.5 (6.1)      |              | 0.93              |
| 1. Able to adapt to change                       | 3.29 (0.68)     | 0.80         |                   |
| 2. Can deal with whatever comes                  | 3.18 (0.74)     | 0.82         |                   |
| 3. Tries to see humorous side of problems        | 3.19 (0.79)     | 0.71         |                   |
| 4. Coping with stress can strengthen me          | 3.11 (0.79)     | 0.72         |                   |
| 5. Tend to bounce back after illness or hardship | 3.25 (0.76)     | 0.83         |                   |
| 6. Can achieve goals despite obstacles           | 3.34 (0.71)     | 0.82         |                   |
| 7. Can stay focused under pressure               | 3.03 (0.78)     | 0.81         |                   |
| 8. Not easily discouraged by failure             | 2.74 (0.91)     | 0.75         |                   |
| 9. Thinks of self as strong person               | 3.20 (0.78)     | 0.83         |                   |
| 10. Can handle unpleasant feeling                | 3.19 (0.73)     | 0.81         |                   |

**Table 4. IM Resident Physicians' Mean Scores on, Factor Loadings of, and Internal Consistency Reliability of the Grit-S (N=472)**

| Item                                                                                                | Mean Score (SD) | Item Loading            |                        | Cronbach $\alpha$ |
|-----------------------------------------------------------------------------------------------------|-----------------|-------------------------|------------------------|-------------------|
|                                                                                                     |                 | Consistency of Interest | Perseverance of Effort |                   |
| <b>Consistency of Interest (reverse-scored)</b>                                                     |                 |                         |                        | 0.84              |
| 1. New ideas and projects sometimes distract me from previous ones.                                 | 2.99 (0.95)     | 0.83                    | 0.002                  |                   |
| 3. I have been obsessed with a certain idea or project for a short time but later lost interest.    | 3.39 (0.95)     | 0.84                    | 0.11                   |                   |
| 5. I often set a goal but later choose to pursue a different one.                                   | 3.63 (0.88)     | 0.80                    | 0.26                   |                   |
| 6. I have difficulty maintaining my focus on projects that take more than a few months to complete. | 3.56 (1.03)     | 0.76                    | 0.29                   |                   |
| Overall Consistency of Interest mean                                                                | 3.39 (0.79)     |                         |                        |                   |
| <b>Perseverance of Effort</b>                                                                       |                 |                         |                        | 0.71              |
| 2. Setbacks don't discourage me.                                                                    | 3.40 (0.94)     | 0.08                    | 0.49                   |                   |
| 4. I am a hard worker.                                                                              | 4.48 (0.70)     | 0.05                    | 0.86                   |                   |
| 7. I finish whatever I begin.                                                                       | 3.95 (0.84)     | 0.47                    | 0.63                   |                   |

|                                     |                |      |      |      |
|-------------------------------------|----------------|------|------|------|
| 8. I am diligent.                   | 4.33<br>(0.72) | 0.17 | 0.87 |      |
| Overall Perseverance of Effort mean | 4.04<br>(0.59) |      |      |      |
| <b>Grit-S Overall (1-5)</b>         | 3.72<br>(0.59) |      |      | 0.82 |

**Table 5. Associations of Performance Measures with CD-RISC 10 and Grit-S**

| Variable             | Metric (scale)                | CD-RISC 10 (0-40) |               |         | Grit-S (1-5) |             |         |
|----------------------|-------------------------------|-------------------|---------------|---------|--------------|-------------|---------|
|                      |                               | $\beta$           | 95% CI        | p-value | $\beta$      | 95% CI      | p-value |
| Medical Knowledge    | IM-ITE, percentile            | -0.34             | -0.62, -0.05  | 0.02    | 0.42         | -3.29, 4.12 | 0.83    |
| Professionalism      | Conference Attendance, number | -0.07             | -0.31, 0.18   | 0.59    | 2.70         | 0.11, 5.29  | 0.04    |
|                      | Evaluation Completion, %      | 0.19              | -0.05, 0.43   | 0.13    | 2.51         | 0.35, 4.67  | 0.02    |
| Clinical Performance | Faculty Evaluations (0-10)    | 0.0002            | -0.01, 0.01   | 0.98    | 0.06         | -0.08, 0.20 | 0.38    |
|                      | Peer Evaluations (0-10)       | 0.02              | -0.0006, 0.03 | 0.06    | 0.09         | -0.09, 0.26 | 0.33    |
|                      | Mini-CEX (0-10)               | -0.02             | -0.05, -0.002 | 0.03    | -0.20        | -0.47, 0.06 | 0.13    |

# BMJ Open

## How Do We Assess Resilience and Grit among Internal Medicine Residents at the Mayo Clinic? A Longitudinal Validity Study Including Correlations with Medical Knowledge, Professionalism, and Clinical Performance

|                                 |                                                                                                                                                                                                                                                                                                                                                                                                                                                                                                                                                                                                                                                                                                                                                                                                                                                                                                                                   |
|---------------------------------|-----------------------------------------------------------------------------------------------------------------------------------------------------------------------------------------------------------------------------------------------------------------------------------------------------------------------------------------------------------------------------------------------------------------------------------------------------------------------------------------------------------------------------------------------------------------------------------------------------------------------------------------------------------------------------------------------------------------------------------------------------------------------------------------------------------------------------------------------------------------------------------------------------------------------------------|
| Journal:                        | <i>BMJ Open</i>                                                                                                                                                                                                                                                                                                                                                                                                                                                                                                                                                                                                                                                                                                                                                                                                                                                                                                                   |
| Manuscript ID                   | bmjopen-2020-040699.R2                                                                                                                                                                                                                                                                                                                                                                                                                                                                                                                                                                                                                                                                                                                                                                                                                                                                                                            |
| Article Type:                   | Original research                                                                                                                                                                                                                                                                                                                                                                                                                                                                                                                                                                                                                                                                                                                                                                                                                                                                                                                 |
| Date Submitted by the Author:   | 29-Oct-2020                                                                                                                                                                                                                                                                                                                                                                                                                                                                                                                                                                                                                                                                                                                                                                                                                                                                                                                       |
| Complete List of Authors:       | Alahdab, Fares; Mayo Clinic, Mayo Evidence-based Practice Center<br>Halvorsen, Andrew; Mayo Clinic, Office of Educational Innovations, Internal Medicine Residency Program<br>Mandrekar, Jayawant ; Mayo Clinic, Division of Biomedical Statistics and Informatics, Department of Health Sciences Research<br>Vaa, Brianna; Mayo Clinic, Division of Community Internal Medicine<br>Montori, Victor; Mayo Clinic, Knowledge and Evaluation Research Unit<br>West, Colin; Mayo Clinic, Division of General Internal Medicine, Department of Medicine; Mayo Clinic, Division of Biomedical Statistics and Informatics, Department of Health Sciences Research<br>Murad, M. Hassan; Mayo Clinic, Division of Preventive, Occupational, and Aerospace Medicine; Mayo Clinic, Mayo Evidence-Based Practice Center, Mayo Clinic<br>Beckman, Thomas; Mayo Clinic, Division of General Internal Medicine, Department of Internal Medicine |
| <b>Primary Subject Heading</b>: | Medical education and training                                                                                                                                                                                                                                                                                                                                                                                                                                                                                                                                                                                                                                                                                                                                                                                                                                                                                                    |
| Secondary Subject Heading:      | General practice / Family practice                                                                                                                                                                                                                                                                                                                                                                                                                                                                                                                                                                                                                                                                                                                                                                                                                                                                                                |
| Keywords:                       | INTERNAL MEDICINE, MEDICAL EDUCATION & TRAINING, STATISTICS & RESEARCH METHODS                                                                                                                                                                                                                                                                                                                                                                                                                                                                                                                                                                                                                                                                                                                                                                                                                                                    |
|                                 |                                                                                                                                                                                                                                                                                                                                                                                                                                                                                                                                                                                                                                                                                                                                                                                                                                                                                                                                   |

SCHOLARONE™  
Manuscripts



I, the Submitting Author has the right to grant and does grant on behalf of all authors of the Work (as defined in the below author licence), an exclusive licence and/or a non-exclusive licence for contributions from authors who are: i) UK Crown employees; ii) where BMJ has agreed a CC-BY licence shall apply, and/or iii) in accordance with the terms applicable for US Federal Government officers or employees acting as part of their official duties; on a worldwide, perpetual, irrevocable, royalty-free basis to BMJ Publishing Group Ltd ("BMJ") its licensees and where the relevant Journal is co-owned by BMJ to the co-owners of the Journal, to publish the Work in this journal and any other BMJ products and to exploit all rights, as set out in our [licence](#).

The Submitting Author accepts and understands that any supply made under these terms is made by BMJ to the Submitting Author unless you are acting as an employee on behalf of your employer or a postgraduate student of an affiliated institution which is paying any applicable article publishing charge ("APC") for Open Access articles. Where the Submitting Author wishes to make the Work available on an Open Access basis (and intends to pay the relevant APC), the terms of reuse of such Open Access shall be governed by a Creative Commons licence – details of these licences and which [Creative Commons](#) licence will apply to this Work are set out in our licence referred to above.

Other than as permitted in any relevant BMJ Author's Self Archiving Policies, I confirm this Work has not been accepted for publication elsewhere, is not being considered for publication elsewhere and does not duplicate material already published. I confirm all authors consent to publication of this Work and authorise the granting of this licence.

## How Do We Assess Resilience and Grit among Internal Medicine Residents at the Mayo Clinic? A Longitudinal Validity Study Including Correlations with Medical Knowledge, Professionalism, and Clinical Performance

Fares Alahdab, MD, MSc<sup>1</sup>, Andrew J Halvorsen MS<sup>2</sup>, Jayawant N Mandrekar, PhD<sup>3</sup>, Brianna E Vaa MD<sup>4</sup>, Victor M Montori, MD, MSc<sup>5,6</sup>, Colin P West MD, PhD,<sup>7,8</sup> M Hassan Murad, MD, MPH<sup>1,9</sup>, Thomas J Beckman, MD<sup>10</sup>

<sup>1</sup>Mayo Evidence-Based Practice Center, Mayo Clinic, Rochester, Minnesota.

<sup>2</sup>Office of Educational Innovations, Internal Medicine Residency Program, Mayo Clinic, Rochester, Minnesota.

<sup>3</sup>Division of Biomedical Statistics and Informatics, Department of Health Sciences Research, Mayo Clinic, Rochester, Minnesota.

Division of Community Internal Medicine, Assistant Professor of Medicine, Mayo Clinic, Rochester, Minnesota

<sup>5</sup>Knowledge and Evaluation Research Unit, Mayo Clinic, Rochester, Minnesota.

<sup>6</sup>Division of Endocrinology, Diabetes, Metabolism, and Nutrition, Mayo Clinic, Rochester, Minnesota.

<sup>7</sup>Division of General Internal Medicine, Department of Medicine, Mayo Clinic, Rochester, Minnesota

<sup>8</sup>Division of Biomedical Statistics and Informatics, Department of Health Sciences Research, Mayo Clinic, Rochester, Minnesota

<sup>9</sup>Division of Preventive, Occupational, and Aerospace Medicine, Mayo Clinic, Rochester, Minnesota.

<sup>10</sup>Division of General Internal Medicine, Department of Internal Medicine, Mayo Clinic, Rochester, Minnesota.

Corresponding author:

Fares Alahdab, MD

Mayo Evidence-Based Practice Center

Mayo Clinic, Rochester, MN

Email: [fares.alahdab@gmail.com](mailto:fares.alahdab@gmail.com)

Twitter: @fares\_alahdab

Keywords: resilience, grit, validity analysis, medical education, residency, wellbeing, burnout

Word count: 2,870

## Abstract

**Background:** There has been limited research on the positive aspects of physician wellness and to our knowledge there have been no validity studies on measures of resilience and grit among internal medicine (IM) residents.

**Objectives:** To investigate the validity of resilience (CD-RISC 10) and grit (GRIT-S) scores among IM residents at a large academic center, and assess potential associations with previously validated measures of medical knowledge, clinical performance, and professionalism.

**Methods:** We evaluated CD-RISC 10 and GRIT-S instrument scores among IM residents at the Mayo Clinic Rochester, Minnesota between July 2017 and June 2019. We analyzed dimensionality, internal consistency reliability, and criterion validity in terms of relationships between resilience and grit, with standardized measures of residents' medical knowledge (in-training examination [ITE]), clinical performance (faculty and peer evaluations and mini-clinical evaluation exercise [mini-CEX]), and professionalism/dutifulness (conference attendance and evaluation completion).

**Results:** A total of 213 out of 253 (84.2%) survey-eligible IM residents provided both CD-RISC 10 and GRIT-S survey responses. Internal consistency reliability (Cronbach alpha) was excellent for CD-RISC 10 (0.93) and GRIT-S (0.82) overall, and for the GRIT subscales of consistency of interest (0.84) and perseverance of effort (0.71). CD-RISC 10 scores were negatively associated with ITE percentile ( $\beta = -3.4$ , 95% CI: -6.2 to -0.5,  $P=0.02$ ) and mini-CEX ( $\beta = -0.2$ , 95% CI: -0.5 to -0.02,  $P=0.03$ ). GRIT-S scores were positively associated with evaluation completion percentage ( $\beta = 2.51$ , 95% CI: 0.35 to 4.67,  $P=0.02$ ) and conference attendance ( $\beta = 2.70$ , 95% CI: 0.11 to 5.29,  $P=0.04$ ).

**Conclusions:** This study revealed favorable validity evidence for CD-RISC 10 and GRIT-S among IM residents. Residents demonstrated resilience within a competitive training environment despite less favorable test performance and grittiness that was manifested by completing tasks. This initial validity study provides a foundation for further research on resilience and grit among physicians-in-training.

### Strengths and limitations of this study

- This is the first validity study of CD-RISC 10 and Grit-S scores among IM residents for resilience and grit respectively, and was completed at a large academic center in the U.S.
- This study evaluated the dimensionality, internal consistency reliability, and the criterion validity of these two measures among IM residents.



- This study provides a foundation for further research on resilience and grit among physicians in training.
- This was an observational study, which limits the ability to draw causal inferences about the relationships found.
- The analysis did not adjust for resident age, gender, or international versus U.S. medical graduation status, as they are non-modifiable variables in terms of career development and enhancing residency curricula.

For peer review only

## BACKGROUND

The prevalence of physician burnout in the US is estimated to be approximately 50% among physicians-in-training (1-4) and practicing physicians. (5-7) Notably, burnout rates are higher for physicians than other professionals even after adjusting for work hours. (8, 9) It is unclear why burnout rates are higher in certain residency programs and among particular individuals within the same clinical settings. (10) Since burnout seems to begin during medical school, (3, 11) tackling this problem at earlier stages could help mitigate its consequences later. Furthermore, although there has been much research on correlates of burnout, (12) there is limited research on the positive aspects of physician wellness and very little known about resilience and grit among internal medicine residents.

The American Psychological Association (APA) describes resilience as adapting effectively to stressors such as relationship problems, serious health issues, or workplace and financial challenges. (13) That is, resilience is the capacity to respond to adversity such that goals are achieved at minimal psychological and physical cost. Essentially, resilient individuals "bounce back" after challenges while also growing stronger. (14) Although several models of resilience have evolved over the years, (15) the dominant paradigm of resilience is dynamic, linking neurobiology, behavior, and environmental conditions. (16) Resilience is considered essential for enhancing quality of medical care, empathy for patients, and sustainability of the healthcare workforce as a whole. (14) Moreover, low resilience may impair brain function, even resulting in posttraumatic stress disorder (PTSD), depression, and other psychiatric disorders. (17) Yet, most people do not develop such conditions after experiencing difficult life events and are thus considered to be "resilient". Resilience as a successful adaptation relies on effective responses to environmental challenges and, ultimately, resistance to the harmful effects of stress. (18) Therefore, a greater understanding of the factors that promote resilience is critical. (19)

The most widely used assessment of resilience is the Connor-Davidson Resilience Scale (CD-RISC). Use of the CD-RISC has shown that resilience is modifiable and can be improved. A shorter version of this scale, which has similar psychometric properties, is the CD-RISC 10. (20) Evidence based on the use of this assessment measure suggests that resilience can be promoted in healthcare workplaces, (21) although research on physicians is scarce.

Grit is defined as the perseverance and passion for long-term goals. (22-24) Rather than avoidance and shying away, grit means working towards achieving specific outcomes despite difficulty, failure, or adversity. (25) Individuals who remain focused on a goal or task and see it through to satisfactory completion would be described as "gritty". (26) Grit is a predictor of success in stressful, high-achievement fields including,

1  
2  
3 but not limited to, surgical residency, (27-29) emergency residency,(30) military, (23)  
4 and pharmacy. (31) The original Grit Scale (Grit-O) consists of 12 items, each rated on  
5 a 5-point scale, (1-5) classified under two main domains: 1) consistency of interest, and  
6 2) perseverance of effort, with six elements each. (22) Subsequently, an abbreviated (8-  
7 question) scale with improved psychometric properties was developed by the same  
8 investigators to measure trait-level perseverance and passion for long-term goals (Grit-  
9 S), (23)  
10  
11  
12

13 Although there has been ample research on relationships between burnout and various  
14 aspects of professionalism and clinical performance among resident physicians, (32-36)  
15 to our knowledge the CD-RISC 10 and Grit-S scales have not been previously validated  
16 in U.S. internal medicine residents. Furthermore, there remains the need for further  
17 research on positive aspects of physician wellness – such as resilience and grit – which  
18 may serve to counterbalance burnout.  
19  
20  
21

22 In this study we assessed the validity of CD-RISC 10 and Grit-S scores among internal  
23 medicine (IM) residents at a large academic medical center. Additionally, we examined  
24 associations between resident resilience and grit based on CD-RISC 10 and Grit-S  
25 scores, respectively, with previously standardized measures of medical knowledge (the  
26 in-training examination), professionalism (dutifulness based on conference attendance  
27 and evaluation completion), and clinical performance (validated, multisource, clinical  
28 performance evaluations).  
29  
30  
31

## 32 **METHODS**

### 33 **Study Design and Sample**

34  
35 This was a longitudinal cohort study of IM residents training at Mayo Clinic Rochester  
36 between July 2017 and June 2019 who were invited to participate in the Mayo Internal  
37 Medicine Well-Being (IMWELL) Study. We used existing survey data from the IMWELL  
38 study in addition to administrative data collected routinely on IM residents at Mayo Clinic  
39 in Rochester, MN. This study was deemed exempt by the Mayo Institutional Review  
40 Board.  
41  
42  
43  
44

### 45 **The Mayo IMWELL Study**

46  
47 The prospective, longitudinal, Mayo IMWELL study was initiated in 2003 to evaluate IM  
48 residents' burnout, quality of life, and empathy, along with other measures of well-being  
49 (37-40). Enrollment is voluntary and is offered during the orientation of all new interns  
50 (categorical and preliminary) in the IM residency program. Incentives were not given.  
51 For the time frame between July 2017 to June 2019, 253 residents were eligible to be  
52 enrolled as participants and were surveyed twice per year. An additional survey was  
53 sent each spring to graduating categorical residents. Identities of participants were  
54  
55  
56  
57

1  
2  
3 anonymized during data collection and before analysis using numerical codes. The CD-  
4 RISC 10 and Grit-S instruments were added to the IMWELL study surveys starting July  
5 2017. The CD-RISC 10 and Grit-S scores from the IMWELL study for each resident  
6 were merged with each resident's residency performance metrics during the  
7 subsequent 6 months (July to December or January to June) on the other relevant  
8 instruments described below.  
9  
10

## 11 **Validity Evidence**

12  
13  
14 The validity argument for this study was based on a modern approach to validity which  
15 states that all validity is construct validity, and that validity evidence is gathered from the  
16 categories of content, internal structure, relations to other variables, response process,  
17 and consequences. (41) Content refers to relationships between an assessment's  
18 wording and the construct that it purportedly measures. Internal structure refers to the  
19 degree to which instrument items fit the underlying construct and is often reported in  
20 terms of dimensionality and reliability. Relations to other variables evidence is the  
21 relationship between scores and other variables relevant to the construct being  
22 measured, such that the relationships may be positive or negative depending on the  
23 constructs being measured. (42) Notably, research has indicated that commonly  
24 reported categories of validity evidence among education research studies come from  
25 the categories of content, internal structure, and relations to other variables. (42)  
26  
27  
28  
29  
30

## 31 **Instruments and Scales Used**

32  
33 Short Grit Scale (Grit-S): An 8-item assessment, each rated on a 5-point scale (1=Not  
34 like me at all, 2=Not much like me, 3=Somewhat like me, 4=Mostly like me, 5=Very  
35 much like me), covering two factors, (23) that measures trait-level perseverance and  
36 passion for long-term goals. It has 4 fewer items than the original grit scale (Grit-O) (22)  
37 with improved psychometric properties. The Short Grit (Grit-S) scale is a brief version of  
38 the original 12-item Grit-O scale. Previous studies have shown that it has predictive  
39 validity, consensual validity, and test-retest stability. Factor analysis, and later  
40 confirmatory factor analysis, has supported a 2-factor structure of the scale reflecting  
41 "consistency of interest" and "perseverance of effort". Both factors showed adequate  
42 internal consistency reliability. (23)  
43  
44  
45  
46

47 10 item Connor-Davidson Resilience Scale (CD-RISC 10): An assessment consisting of  
48 10 items, rated on a 5-point scales (0=Not true at all, 1=Rarely true, 2=Sometimes true,  
49 3=Often true, 4=True nearly all of the time), with higher scores indicating greater  
50 resilience. (43) It has ability to distinguish between those with greater and lesser  
51 resilience levels, and to demonstrate that resilience is modifiable and can be improved.  
52 The reliability and validity of the Connor-Davidson Resilience scale (CD-RISC) were  
53 previously evaluated and performed well in other settings. Factor analysis revealed five  
54  
55  
56  
57

1  
2  
3 factors for the CD-RISC scale. (43) CD-RISC 10 is a 10-item version of this scale with  
4 good internal consistency and evidence to support construct validity. (20) Further  
5 validation studies have shown excellent performance of the CD-RISC 10 among the  
6 general population (44) and trainees in the United States Air Force. (45)  
7  
8

9 Knowledge measures: This included In-Training Exam (ITE) score percentiles. The ITE  
10 is administered to all U.S. IM residents annually. Residents in this study were  
11 administered the ITE annually each fall. Validity of the ITE scores has been established  
12 in several studies. (46, 47)  
13  
14

15 Professionalism and dutifulness measures: This included conference attendance and  
16 evaluation completion, which were reported as relations to variables validity evidence in  
17 our previous studies of residents at the Mayo Clinic. (48) Conference attendance was  
18 assessed using in-person card-swipe data. Evaluation completion percentage was  
19 determined from the MedHub<sup>®</sup> residency evaluation system for our study's time frame.  
20  
21  
22

23 Clinical performance: We selected clinical performance measures as association  
24 variables for this study, because we believed that standardized assessments of  
25 performance are among the most rigorous challenges for testing residents' resilience  
26 and grit. Clinical performance was determined by faculty and peer evaluations and the  
27 standardized Mini Clinical Evaluation Examination (Mini-CEX). (49, 50) The Mini-CEX  
28 evaluates core clinical skills by trainees, namely medical interviewing, physical  
29 examination, informed decision-making/counseling, and clinical judgment/reasoning.  
30 The Mini-CEX has demonstrated validity evidence among internal medicine residents.  
31 (49-52) The mini-CEX used at Mayo Clinic Rochester incorporates a 5-point scale.  
32 Multisource assessments of residents' clinical performance at Mayo Clinic Rochester  
33 are completed by faculty, peers and senior medical residents. Items within these clinical  
34 performance assessments have shown multi-dimensionality and excellent internal  
35 consistency reliability. (53, 54) The clinical performance evaluations (peer evaluations,  
36 faculty evaluations, and mini-CEX ratings) are administered by the residency evaluation  
37 platform, MedHub<sup>®</sup>. Aggregate reports of evaluations can be obtained by timeframe of  
38 interest, with all assessments standardized to a score in the range of 0-10.  
39  
40  
41  
42  
43  
44

## 45 **Data Analysis**

46

47 Participants' demographics were summarized using descriptive statistics. Continuous  
48 variables such as age were summarized as mean (standard deviation). Nominal  
49 variables, such as gender, were reported using a count (percent of total). Only fully  
50 completed Grit-S and CD-RISC 10 instruments were included in the analysis. A  
51 threshold of  $p < 0.05$  was used to determine statistical significance. Statistical analyses  
52 were conducted using SAS version 9.4 (SAS Institute, Inc., Cary, NC).  
53  
54  
55  
56  
57  
58  
59  
60

## Validation of the CD-RISC 10 and Grit-S Scales among Internal Medicine Residents

It has been recommended to re-examine the validity of assessments when applying them to new contexts and educational settings. (55) Therefore, we evaluated the internal structure validity of the CD-RISC 10 and Grit-S for this study as follows:

1. Factor analyses of the CD-RISC 10 & Grit-S instruments were done using principal components analysis with a minimum eigenvalue of 1 criterion. An orthogonal Varimax rotation was used to estimate item loadings. Items with factor loadings of 0.48 or more were retained. (56) Internal consistency reliabilities for items comprising each factor and overall were determined using Cronbach alpha, where  $\alpha > 0.7$  was considered acceptable. (56) Scale values were reversed for the 'Consistency of Interest' factor items of Grit-S (1, 3, 5, and 6) so that 1=very much like me, 2=mostly like me, 3=somewhat like me, 4=not much like me, 5=not like me at all, so that higher item scores reflect increased 'Grit'.
2. Criterion validity (relations to other variables): Unadjusted bivariate associative analyses used generalized linear models with normal response distributions and identity link functions estimated via generalized estimating equations (GEEs) with an exchangeable covariance matrix. The CD-RISC 10 and Grit-S scores were treated as the explanatory variables, and residency performance in the various metrics during the subsequent 6 months were the outcome variables.

### Patient and public involvement:

Patients and the public were not involved in this research study.

## RESULTS

### Sample Characteristics

From a total of 253 eligible IM residents training at Mayo Clinic Rochester between July 2017 and June 2019, 213 (84.2%) completed at least 1 IMWELL survey, resulting in 468 completed CD-RISC 10 and 472 Grit-S surveys from a total of 801 possible surveys. A total of 461 IMWELL surveys included complete responses for both scales. The distributions of overall scores were assessed visually, with Grit-S appearing approximately normal and CD-RISC 10 displaying some left-skewness. There were 193 ITE percentiles and 358 mini-CEX evaluations available for the same time period. The demographic characteristics of the participants are shown in Table 1.

### Medical Knowledge, Clinical Performance, and Professionalism Metrics



1  
2  
3 The ITE score percentiles among residents in our study (N=193) ranged from 18-100,  
4 with a mean (SD) of 83.3 (15.5). Clinical performance, as reflected by faculty  
5 evaluations (N=429), peer evaluations (N=362), and mini-CEX (N=358) showed mean  
6 (SD) scores of 7.84 (0.69), 8.09 (0.83), and 8.19 (1.59), respectively. Performance  
7 measure summaries are shown in Table 2.  
8  
9

## 10 **Validity Analyses of the CD-RISC 10 and GRIT-S Instruments**

11  
12 Regarding the internal structure validity evidence for the scales among IM residents, the  
13 CD-RISC 10 index demonstrated a single dimension of resilience while the GRIT-S  
14 index demonstrated two dimensions of grittiness. The internal consistency reliability for  
15 both scales overall, and for the GRIT subscales, was high (Cronbach  $\alpha$ 's>0.7, Tables 3  
16 and 4).  
17  
18  
19

20 The 468 completed CD-RISC 10 scales showed mean scores for individual items  
21 ranging from 2.74 (not easily discouraged by failure) to 3.34 (can achieve goals despite  
22 obstacles) on the 0-4 scale [Table 3]. The overall mean summed (SD) CD-RISC score  
23 was 31.5 (6.1). The 472 completed GRIT-S scales showed individual-item mean scores  
24 ranging from 2.99 (new ideas and projects sometimes distract me from previous ones)  
25 to 4.48 (I am a hard worker) on the 1-5 scale [Table 4]. The overall mean (SD) GRIT-S  
26 score was 3.72 (0.59).  
27  
28  
29

30 Regarding relations to other variables (i.e., criterion) validity evidence, the CD-RISC 10  
31 overall summed scores correlated negatively with medical knowledge acquisition as  
32 measured by ITE score percentile ( $\beta = -0.34$ , 95% CI: -0.62 to -0.05,  $P=0.02$ ). The CD-  
33 RISC 10 overall summed scores also correlated negatively with clinical performance as  
34 measured by the mini-CEX ( $\beta = -0.02$ , 95% CI: -0.05 to -0.002,  $P=0.03$ ) (Table 5).  
35  
36  
37

38 The GRIT-S overall mean score correlated positively with evaluation completion  
39 percentage ( $\beta = 2.51$ , 95% CI: 0.35 to 4.67,  $P=0.02$ ) and in-person conference  
40 attendance ( $\beta = 2.70$ , 95% CI: 0.11 to 5.29,  $P=0.04$ ) (Table 5), which are measures of  
41 the dutifulness aspect of professionalism.  
42  
43

## 44 **DISCUSSION**

45  
46 The CD-RISC 10 and GRIT-S instruments have strong validity in measuring resilience  
47 and grit in several populations (20, 23, 45, 57) and there have been studies of grit in  
48 surgical (28, 29, 58) and emergency medicine residents. (30) However, to our  
49 knowledge, this is the first validity study of the CD-RISC 10 and GRIT-S among IM  
50 residents. Both instruments showed excellent internal consistency reliability, statistically  
51 significant associations with previously validated measures of resident physician  
52 performance, and dimensionality characteristics that are consistent with previous  
53 research.  
54  
55  
56  
57



1  
2  
3 We identified a negative association between residents' CD-RISC 10 scores and  
4 measures of clinical performance (mini-CEX) and medical knowledge (ITE). This finding  
5 might reflect resilient residents' abilities to thrive within a high-pressured IM training  
6 environment, despite performing less favorably on standardized assessments within this  
7 setting. Notably, whether a resident thrives is not determined by their performance on  
8 one of these measures, but rather, by their overall standing within our rigorous training  
9 environment. This finding may be supported by the residents' highest score on the item,  
10 "achieve goals despite obstacles." We also identified a positive association between  
11 GRIT-S scores and evaluation completion, which is a dutifulness aspect of  
12 professionalism. (22, 59) This finding suggests that, as expected, residents with  
13 grittiness tend to finish tasks. Additionally, this finding corresponds to residents' highest  
14 score on the item, "I am a hard worker." Overall, our research should inform future  
15 interventions to improve resident performance and well-being by using the CD-RISC 10  
16 and GRIT-S as roadmaps for curricular interventions.  
17  
18  
19  
20  
21

22 Compared to the general U.S. population included in the original validation studies, (43,  
23 57, 60) the overall mean (SD) resilience score in our sample was comparable [31.5  
24 (6.1) versus 32.1 (5.8) and 31.8 (5.4)]. However, compared to the reference group  
25 aged 25-34 years in the original validation study, the overall mean (SD) GRIT-S score in  
26 our sample was higher [3.72 (0.59) versus 3.2 (0.7)]. (23) Our study participants noted  
27 strong perseverance as reflected by their highest GRIT-S score on the item "I am a hard  
28 worker." Additionally, the dimensionalities for the GRIT-S and CD-RISC 10 scales in our  
29 study were consistent with findings from research in different populations. (61, 62)  
30 However, despite having higher grit and comparable resilience as compared to the  
31 general population, burnout rates among physicians and physicians-in-training appear  
32 to be greater than that of the U.S. working population. (3, 8) This suggests that the  
33 medical profession selects gritty and resilient individuals, yet still manages to burn them  
34 out. Furthermore, research shows that wellbeing indicators are highest upon  
35 matriculation to medical school, and subsequently wane throughout medical training.  
36 (63) Consequently, future research should examine the interactions between burnout,  
37 empathy, resilience, and grit.  
38  
39  
40  
41  
42  
43

44 This study has several limitations. First, it was observational, which constrains the ability  
45 to draw causal inferences about the relationships that were identified. Second, the  
46 analysis did not adjust for age, gender, and international versus U.S. medical  
47 graduation status. Nonetheless, these are non-modifiable variables that would not  
48 facilitate efforts at professional development or enhancing residency curricula. Third,  
49 this study involved IM residents at a large academic medical center, which may limit  
50 generalization to some other specialties and settings. Fourth, although we implicate  
51 potential, counterbalancing interactions between grit and wellness with burnout, this  
52 remains speculative until there is further research that actually examines interactions  
53  
54  
55  
56  
57  
58  
59  
60

1  
2  
3 between performance on these scales among internal medicine residents. Fifth,  
4 residents' self-selection to participate in the study introduces the potential for selection  
5 and response biases, though it is noteworthy that the response/participation rate for this  
6 study was high.  
7  
8

9 Resilience and grit may lessen burnout, yet these relationships remain unclear among  
10 physicians in training. Thus, research on resilience and grit could assist interventions to  
11 mitigate physician burnout (64, 65) and provide a deeper understanding of dynamics  
12 between the issues at play. (66) Findings from this study support use of the CD-RISC  
13 10 and GRIT-S among internal medicine residents and should serve as a foundation for  
14 future research on resilience and grit in medical learners. This research should examine  
15 associations among IM residents between CD-RISC 10 and GRIT-S, with validated  
16 measures of burnout and well-being. It is noteworthy that burnout is prevalent within  
17 current medical education and training systems and may be an indicator of  
18 organizational health. (67, 68) Therefore, improved understanding of resilience and grit  
19 may enhance graduate medical education curricula (36, 69-72) and the wellbeing of  
20 physicians.  
21  
22  
23  
24  
25

26 There have been ample investigations on physician burnout and depression, yet there  
27 has been less research on positive aspects of physician wellness including resilience  
28 and grit among internal medicine residents. Especially during this era of the COVID  
29 pandemic, it is necessary to better understand characteristics of physicians that allow  
30 them to surmount adversity and thrive. Since high resiliency and grit have been  
31 correlated with positive attributes in other populations, we are hopeful that further study  
32 of these traits in residents' will help to improve their quality of life. (27, 58, 73)  
33  
34  
35

#### 36 **Author contributions:**

37 Idea conception: TJB, FA, CPW, VMM

38 Study design and methodology: FA, TJB, AJH

39 Data management and analysis: AJH, JNM

40 Interpretation of the data: FA, AJH, TJB, MHM, BEV

41 Manuscript drafting: FA

42 Supervision: TJB

43 Revising, editing, and final approval of manuscript: all authors.  
44  
45  
46  
47

#### 48 **Disclosure:**

49 No conflicts of interest, financial or other, to declare by any of the authors.  
50  
51

52 Dissemination of study results to study participants is not applicable.  
53

54 No additional data available.  
55  
56  
57  
58  
59  
60

1  
2  
3  
4  
5  
6  
7  
8  
9  
10  
11  
12  
13  
14  
15  
16  
17  
18  
19  
20  
21  
22  
23  
24  
25  
26  
27  
28  
29  
30  
31  
32  
33  
34  
35  
36  
37  
38  
39  
40  
41  
42  
43  
44  
45  
46  
47  
48  
49  
50  
51  
52  
53  
54  
55  
56  
57  
58  
59  
60

The author(s) received no financial support for the research, authorship, and/or publication of this article.

For peer review only

## REFERENCES

1. Dyrbye L, Shanafelt T. A narrative review on burnout experienced by medical students and residents. *Med Educ*. 2016;50(1):132-49.
2. Dyrbye LN, Thomas MR, Massie FS, Power DV, Eacker A, Harper W, et al. Burnout and suicidal ideation among U.S. medical students. *Ann Intern Med*. 2008;149(5):334-41.
3. Dyrbye LN, West CP, Satele D, Boone S, Tan L, Sloan J, et al. Burnout among U.S. medical students, residents, and early career physicians relative to the general U.S. population. *Acad Med*. 2014;89(3):443-51.
4. West CP, Shanafelt TD, Kolars JC. Quality of life, burnout, educational debt, and medical knowledge among internal medicine residents. *JAMA*. 2011;306(9):952-60.
5. Linzer M, Visser MR, Oort FJ, Smets EM, McMurray JE, de Haes HC, et al. Predicting and preventing physician burnout: results from the United States and the Netherlands. *Am J Med*. 2001;111(2):170-5.
6. Allegra CJ, Hall R, Yothers G. Prevalence of burnout in the u.s. Oncology community: results of a 2003 survey. *J Oncol Pract*. 2005;1(4):140-7.
7. Shanafelt TD, Boone S, Tan L, Dyrbye LN, Sotile W, Satele D, et al. Burnout and satisfaction with work-life balance among US physicians relative to the general US population. *Arch Intern Med*. 2012;172(18):1377-85.
8. Shanafelt TD, Hasan O, Dyrbye LN, Sinsky C, Satele D, Sloan J, et al. Changes in Burnout and Satisfaction With Work-Life Balance in Physicians and the General US Working Population Between 2011 and 2014. *Mayo Clin Proc*. 2015;90(12):1600-13.
9. Shanafelt TD, West CP, Sinsky C, Trockel M, Tutty M, Satele DV, et al. Changes in Burnout and Satisfaction With Work-Life Integration in Physicians and the General US Working Population Between 2011 and 2017. *Mayo Clin Proc*. 2019;94(9):1681-94.
10. Quinn MA, Bazari H, Ripp J, Block L, Chretien KC, Fried ED, et al. A Roadmap for Research on Resident Well-Being. *Am J Med*. 2018;131(3):323-8.
11. Brazeau CM, Shanafelt T, Durning SJ, Massie FS, Eacker A, Moutier C, et al. Distress among matriculating medical students relative to the general population. *Acad Med*. 2014;89(11):1520-5.
12. Williams ES, Manwell LB, Konrad TR, Linzer M. The relationship of organizational culture, stress, satisfaction, and burnout with physician-reported error and suboptimal patient care: results from the MEMO study. *Health Care Manage Rev*. 2007;32(3):203-12.
13. Lillian Comas-Diaz P, Suniya S, Luthar, PhD, Salvatore R, Maddi, PhD, H. Katherine (Kit) O'Neill, PhD, Karen W. Saakvitne, PhD, Richard Glenn Tedeschi, PhD. *The Road to Resilience*. <https://www.apa.org/helpcenter/road-resilience.aspx>: American Psychological Association.
14. Epstein RM, Krasner MS. Physician resilience: what it means, why it matters, and how to promote it. *Acad Med*. 2013;88(3):301-3.
15. Chmitorz A, Kunzler A, Helmreich I, Tuscher O, Kalisch R, Kubiak T, et al. Intervention studies to foster resilience - A systematic review and proposal for a resilience framework in future intervention studies. *Clin Psychol Rev*. 2018;59:78-100.
16. Sapienza JK, Masten AS. Understanding and promoting resilience in children and youth. *Curr Opin Psychiatry*. 2011;24(4):267-73.
17. Patel RS, Bachu R, Adikey A, Malik M, Shah M. Factors Related to Physician Burnout and Its Consequences: A Review. *Behav Sci (Basel)*. 2018;8(11).
18. Russo SJ, Murrough JW, Han MH, Charney DS, Nestler EJ. Neurobiology of resilience. *Nat Neurosci*. 2012;15(11):1475-84.
19. Wu G, Feder A, Cohen H, Kim JJ, Calderon S, Charney DS, et al. Understanding resilience. *Front Behav Neurosci*. 2013;7:10.

20. Campbell-Sills L, Stein MB. Psychometric analysis and refinement of the Connor-davidson Resilience Scale (CD-RISC): Validation of a 10-item measure of resilience. *J Trauma Stress*. 2007;20(6):1019-28.
21. Jackson D FA, Edenborough M. Personal resilience as a strategy for surviving and thriving in the face of workplace adversity: a literature review. *J Adv Nurs*. 2007;60(1):1-9.
22. Duckworth AL, Peterson C, Matthews MD, Kelly DR. Grit: perseverance and passion for long-term goals. *J Pers Soc Psychol*. 2007;92(6):1087-101.
23. Duckworth AL, Quinn PD. Development and validation of the short grit scale (grit-s). *J Pers Assess*. 2009;91(2):166-74.
24. Robertson-Kraft C, Duckworth AL. True Grit: Trait-level Perseverance and Passion for Long-term Goals Predicts Effectiveness and Retention among Novice Teachers. *Teach Coll Rec (1970)*. 2014;116(3).
25. Eskreis-Winkler L, Shulman EP, Beal SA, Duckworth AL. The grit effect: predicting retention in the military, the workplace, school and marriage. *Front Psychol*. 2014;5:36.
26. Silvia PJ, Eddington KM, Beaty RE, Nusbaum EC, Kwapil TR. Gritty people try harder: grit and effort-related cardiac autonomic activity during an active coping challenge. *Int J Psychophysiol*. 2013;88(2):200-5.
27. Burkhart RA, Tholey RM, Guinto D, Yeo CJ, Chojnacki KA. Grit: a marker of residents at risk for attrition? *Surgery*. 2014;155(6):1014-22.
28. Salles A, Lin D, Liebert C, Esquivel M, Lau JN, Greco RS, et al. Grit as a predictor of risk of attrition in surgical residency. *Am J Surg*. 2017;213(2):288-91.
29. Samuelsen BT, Desai VS, Turner NS, Kelly AM, Grawe B, Camp CL. Generational Differences in Grit, Self-Control, and Conscientiousness Among Orthopaedic Surgeons: From Millennials to Baby Boomers. *J Bone Joint Surg Am*. 2019;101(14):e71.
30. Kalantari A. Faculty Assessment of Emergency Medicine Resident Grit: A Multicentered Study. *AEM Educ Train*. 2019;3(1):100.
31. Hammond DA. Grit: An important characteristic in learners. *Curr Pharm Teach Learn*. 2017;9(1):1-3.
32. McClafferty H, Brooks AJ, Chen MK, Brenner M, Brown M, Esparham A, et al. Pediatric Integrative Medicine in Residency Program: Relationship between Lifestyle Behaviors and Burnout and Wellbeing Measures in First-Year Residents. *Children (Basel)*. 2018;5(4).
33. Panagioti M, Geraghty K, Johnson J, Zhou A, Panagopoulou E, Chew-Graham C, et al. Association Between Physician Burnout and Patient Safety, Professionalism, and Patient Satisfaction: A Systematic Review and Meta-analysis. *JAMA Intern Med*. 2018;178(10):1317-30.
34. Baer TE, Feraco AM, Tuysuzoglu Sagalowsky S, Williams D, Litman HJ, Vinci RJ. Pediatric Resident Burnout and Attitudes Toward Patients. *Pediatrics*. 2017;139(3).
35. Brown R, Dunn S, Byrnes K, Morris R, Heinrich P, Shaw J. Doctors' stress responses and poor communication performance in simulated bad-news consultations. *Acad Med*. 2009;84(11):1595-602.
36. Fahrenkopf AM, Sectish TC, Barger LK, Sharek PJ, Lewin D, Chiang VW, et al. Rates of medication errors among depressed and burnt out residents: prospective cohort study. *BMJ*. 2008;336(7642):488-91.
37. West CP, Dyrbye LN, Sloan JA, Shanafelt TD. Single item measures of emotional exhaustion and depersonalization are useful for assessing burnout in medical professionals. *J Gen Intern Med*. 2009;24(12):1318-21.
38. West CP, Tan AD, Habermann TM, Sloan JA, Shanafelt TD. Association of resident fatigue and distress with perceived medical errors. *JAMA*. 2009;302(12):1294-300.
39. Beckman TJ, Reed DA, Shanafelt TD, West CP. Impact of resident well-being and empathy on assessments of faculty physicians. *J Gen Intern Med*. 2010;25(1):52-6.

- 1
- 2
- 3
40. Beckman TJ, Reed DA, Shanafelt TD, West CP. Resident physician well-being and assessments of their knowledge and clinical performance. *J Gen Intern Med.* 2012;27(3):325-30.
41. Cook DA, Beckman TJ. Current concepts in validity and reliability for psychometric instruments: theory and application. *Am J Med.* 2006;119(2):166 e7-16.
42. Beckman TJ, Cook DA, Mandrekar JN. What is the validity evidence for assessments of clinical teaching? *J Gen Intern Med.* 2005;20(12):1159-64.
43. Connor KM, Davidson JR. Development of a new resilience scale: the Connor-Davidson Resilience Scale (CD-RISC). *Depress Anxiety.* 2003;18(2):76-82.
44. Ni MY, Li TK, Yu NX, Pang H, Chan BH, Leung GM, et al. Normative data and psychometric properties of the Connor-Davidson Resilience Scale (CD-RISC) and the abbreviated version (CD-RISC2) among the general population in Hong Kong. *Qual Life Res.* 2016;25(1):111-6.
45. Bezdjian S, Schneider KG, Burchett D, Baker MT, Garb HN. Resilience in the United States Air Force: Psychometric properties of the Connor-Davidson Resilience Scale (CD-RISC). *Psychol Assess.* 2017;29(5):479-85.
46. Garibaldi RA, Trontell MC, Waxman H, Holbrook JH, Kanya DT, Khoshbin S, et al. The in-training examination in internal medicine. *Ann Intern Med.* 1994;121(2):117-23.
47. Garibaldi RA, Subhiyah R, Moore ME, Waxman H. The In-Training Examination in Internal Medicine: an analysis of resident performance over time. *Ann Intern Med.* 2002;137(6):505-10.
48. Reed DA, West CP, Mueller PS, Ficalora RD, Engstler GJ, Beckman TJ. Behaviors of highly professional resident physicians. *JAMA.* 2008;300(11):1326-33.
49. Cook DA, Beckman TJ, Mandrekar JN, Pankratz VS. Internal structure of mini-CEX scores for internal medicine residents: factor analysis and generalizability. *Adv Health Sci Educ Theory Pract.* 2010;15(5):633-45.
50. Norcini JJ, Blank LL, Duffy FD, Fortna GS. The mini-CEX: a method for assessing clinical skills. *Ann Intern Med.* 2003;138(6):476-81.
51. Cook DA, Beckman TJ. Does scale length matter? A comparison of nine- versus five-point rating scales for the mini-CEX. *Adv Health Sci Educ Theory Pract.* 2009;14(5):655-64.
52. Hatala R, Ainslie M, Kassen BO, Mackie I, Roberts JM. Assessing the mini-Clinical Evaluation Exercise in comparison to a national specialty examination. *Med Educ.* 2006;40(10):950-6.
53. Beckman TJ, Mandrekar JN, Engstler GJ, Ficalora RD. Determining reliability of clinical assessment scores in real time. *Teach Learn Med.* 2009;21(3):188-94.
54. Post JA, Wittich CM, Thomas KG, Dupras DM, Halvorsen AJ, Mandrekar JN, et al. Rating the Quality of Entrustable Professional Activities: Content Validation and Associations with the Clinical Context. *J Gen Intern Med.* 2016;31(5):518-23.
55. Beckman TJ, Cook DA, Mandrekar JN. Factor instability of clinical teaching assessment scores among general internists and cardiologists. *Med Educ.* 2006;40(12):1209-16.
56. DeVellis RF. *Scale Development: Theory and Applications.* Newbury Park CA: Sage Publications, Inc.; 1991.
57. JRT D. Connor-Davidson Resilience Scale (CD-RISC) Manual. Unpublished. accessible at [www.cd-risc.com](http://www.cd-risc.com); 2018.
58. Salles A, Cohen GL, Mueller CM. The relationship between grit and resident well-being. *Am J Surg.* 2014;207(2):251-4.
59. Miller-Matero LR, Martinez S, MacLean L, Yaremchuk K, Ko AB. Grit: A predictor of medical student performance. *Educ Health (Abingdon).* 2018;31(2):109-13.
60. Campbell-Sills L, Forde DR, Stein MB. Demographic and childhood environmental predictors of resilience in a community sample. *J Psychiatr Res.* 2009;43(12):1007-12.
61. Li C. THE SHOR THE SHORT GRIT SCALE: A DIMENSION T SCALE: A DIMENSIONALITY ANALYSIS. Theses and Dissertations--Educational, School, and Counseling Psychology: University of Kentucky; 2015.



- 1  
2  
3  
4  
5  
6  
7  
8  
9  
10  
11  
12  
13  
14  
15  
16  
17  
18  
19  
20  
21  
22  
23  
24  
25  
26  
27  
28  
29  
30  
31  
32  
33  
34  
35  
36  
37  
38  
39  
40  
41  
42  
43  
44  
45  
46  
47  
48  
49  
50  
51  
52  
53  
54  
55  
56  
57  
58  
59  
60
62. Daniel F.Gucciardi BJ, Tristan J.Coulter, Clifford J.Mallett. The Connor-Davidson Resilience Scale (CD-RISC): Dimensionality and age-related measurement invariance with Australian cricketers. *Psychology of Sport and Exercise*. 2011;12(4):423-33.
63. Hansell MW, Ungerleider RM, Brooks CA, Knudson MP, Kirk JK, Ungerleider JD. Temporal Trends in Medical Student Burnout. *Fam Med*. 2019;51(5):399-404.
64. West CP, Dyrbye LN, Erwin PJ, Shanafelt TD. Interventions to prevent and reduce physician burnout: a systematic review and meta-analysis. *Lancet*. 2016;388(10057):2272-81.
65. Panagioti M, Panagopoulou E, Bower P, Lewith G, Kontopantelis E, Chew-Graham C, et al. Controlled Interventions to Reduce Burnout in Physicians: A Systematic Review and Meta-analysis. *JAMA Intern Med*. 2017;177(2):195-205.
66. Lotte N. Dyrbye TDS, Christine A. Sinsky, Pamela F. Cipriano, Jay Bhatt, Alexander Ommaya, Colin P. West, David Meyers. Burnout Among Health Care Professionals: A Call to Explore and Address This Underrecognized Threat to Safe, High-Quality Care. National Academy of Medicine; 2017.
67. Montgomery A. The inevitability of physician burnout: Implications for interventions. *Burnout Research*. 2014;1(1):50-6.
68. Wallace JE, Lemaire JB, Ghali WA. Physician wellness: a missing quality indicator. *Lancet*. 2009;374(9702):1714-21.
69. Shanafelt TD, West C, Zhao X, Novotny P, Kolars J, Habermann T, et al. Relationship between increased personal well-being and enhanced empathy among internal medicine residents. *J Gen Intern Med*. 2005;20(7):559-64.
70. Firth-Cozens J, Greenhalgh J. Doctors' perceptions of the links between stress and lowered clinical care. *Soc Sci Med*. 1997;44(7):1017-22.
71. Shanafelt TD, Bradley KA, Wipf JE, Back AL. Burnout and self-reported patient care in an internal medicine residency program. *Ann Intern Med*. 2002;136(5):358-67.
72. West CP, Huschka MM, Novotny PJ, Sloan JA, Kolars JC, Habermann TM, et al. Association of perceived medical errors with resident distress and empathy: a prospective longitudinal study. *JAMA*. 2006;296(9):1071-8.
73. Halliday L, Walker A, Vig S, Hines J, Brecknell J. Grit and burnout in UK doctors: a cross-sectional study across specialties and stages of training. *Postgrad Med J*. 2017;93(1101):389-94.



**Table 1. Baseline Characteristics of Internal Medicine Resident Physicians**

| Variable                                                                                                                                                                                                                  | Level       | Total (N=253) | ≥1 Survey (N=213) | No Survey (N=40) | P value |
|---------------------------------------------------------------------------------------------------------------------------------------------------------------------------------------------------------------------------|-------------|---------------|-------------------|------------------|---------|
| Sex                                                                                                                                                                                                                       | Male        | 165 (65.2%)   | 137 (64.3%)       | 28 (70.0%)       | 0.59    |
|                                                                                                                                                                                                                           | Female      | 88 (34.8%)    | 76 (35.7%)        | 12 (30%)         |         |
| Program                                                                                                                                                                                                                   | Categorical | 196 (77.5%)   | 170 (79.8%)       | 26 (65.0%)       | 0.06    |
|                                                                                                                                                                                                                           | Preliminary | 57 (22.5%)    | 43 (20.2%)        | 14 (35.0%)       |         |
| Match Year                                                                                                                                                                                                                | 2015        | 50 (19.8%)    | 40 (18.8%)        | 10 (25.0%)       | 0.40    |
|                                                                                                                                                                                                                           | 2016        | 47 (18.6%)    | 39 (18.3%)        | 8 (20.0%)        |         |
|                                                                                                                                                                                                                           | 2017        | 78 (30.8%)    | 70 (32.9%)        | 8 (20.0%)        |         |
|                                                                                                                                                                                                                           | 2018        | 78 (30.8%)    | 64 (30.1%)        | 14 (35.0%)       |         |
| Age                                                                                                                                                                                                                       | Mean (SD)   | 27.72 (2.62)  | 27.69 (2.66)      | 27.90 (2.43)     | 0.62    |
| Possible Surveys                                                                                                                                                                                                          | Mean (SD)   | 3.17 (1.17)   | 3.20 (1.17)       | 3.00 (1.18)      | 0.33    |
| Completed Surveys                                                                                                                                                                                                         | Mean (SD)   | -             | 2.16 (1.08)       | -                | -       |
| Notes: Baseline Characteristics of 253 Survey Eligible IM Resident Physicians from July 2017 Through June 2019 (213 [84.2%] IM Resident Physicians Completed 461 [57.6%] CD-RISC 10 / Grit-S Surveys out of 801 possible) |             |               |                   |                  |         |

**Table 2. Medical Knowledge, Professionalism, and Clinical Performance Measures for 210 IM Resident Physicians Providing Data from July 2017 to June 2019 (N=429)**

| Variable             | Metric (scale)                | n (Eligible) | n (Responses) | Mean (SD)   | Range     |
|----------------------|-------------------------------|--------------|---------------|-------------|-----------|
| Medical Knowledge    | IM-ITE, percentile            | 353          | 193           | 83.3 (15.5) | 18-100    |
| Professionalism      | Conference Attendance, number | 705          | 429           | 53.8 (14.3) | 6-95      |
|                      | Evaluation Completion, %      | 705          | 429           | 77.3 (11.5) | 22-100    |
| Clinical Performance | Faculty Evaluations (0-10)    | 705          | 429           | 7.84 (0.69) | 4.49-9.37 |
|                      | Peer Evaluations (0-10)       | 705          | 362           | 8.09 (0.83) | 4.13-10   |
|                      | Mini-CEX (0-10)               | 705          | 358           | 8.19 (1.59) | 4.00-10   |

**Table 3. IM Resident Physicians' Mean Scores on, Factor Loadings of, and Internal Consistency Reliability of the CD-RISC 10 (N=468)**

| Item                                             | Mean Score (SD) | Item Loading | Cronbach $\alpha$ |
|--------------------------------------------------|-----------------|--------------|-------------------|
| <b>CD-RISC 10 overall (0-40)</b>                 | 31.5 (6.1)      |              | 0.93              |
| 1. Able to adapt to change                       | 3.29 (0.68)     | 0.80         |                   |
| 2. Can deal with whatever comes                  | 3.18 (0.74)     | 0.82         |                   |
| 3. Tries to see humorous side of problems        | 3.19 (0.79)     | 0.71         |                   |
| 4. Coping with stress can strengthen me          | 3.11 (0.79)     | 0.72         |                   |
| 5. Tend to bounce back after illness or hardship | 3.25 (0.76)     | 0.83         |                   |
| 6. Can achieve goals despite obstacles           | 3.34 (0.71)     | 0.82         |                   |
| 7. Can stay focused under pressure               | 3.03 (0.78)     | 0.81         |                   |
| 8. Not easily discouraged by failure             | 2.74 (0.91)     | 0.75         |                   |
| 9. Thinks of self as strong person               | 3.20 (0.78)     | 0.83         |                   |
| 10. Can handle unpleasant feeling                | 3.19 (0.73)     | 0.81         |                   |

**Table 4. IM Resident Physicians' Mean Scores on, Factor Loadings of, and Internal Consistency Reliability of the Grit-S (N=472)**

| Item                                                                                                | Mean Score (SD) | Item Loading            |                        | Cronbach $\alpha$ |
|-----------------------------------------------------------------------------------------------------|-----------------|-------------------------|------------------------|-------------------|
|                                                                                                     |                 | Consistency of Interest | Perseverance of Effort |                   |
| <b>Consistency of Interest (reverse-scored)</b>                                                     |                 |                         |                        | 0.84              |
| 1. New ideas and projects sometimes distract me from previous ones.                                 | 2.99 (0.95)     | 0.83                    | 0.002                  |                   |
| 3. I have been obsessed with a certain idea or project for a short time but later lost interest.    | 3.39 (0.95)     | 0.84                    | 0.11                   |                   |
| 5. I often set a goal but later choose to pursue a different one.                                   | 3.63 (0.88)     | 0.80                    | 0.26                   |                   |
| 6. I have difficulty maintaining my focus on projects that take more than a few months to complete. | 3.56 (1.03)     | 0.76                    | 0.29                   |                   |
| Overall Consistency of Interest mean                                                                | 3.39 (0.79)     |                         |                        |                   |
| <b>Perseverance of Effort</b>                                                                       |                 |                         |                        | 0.71              |
| 2. Setbacks don't discourage me.                                                                    | 3.40 (0.94)     | 0.08                    | 0.49                   |                   |
| 4. I am a hard worker.                                                                              | 4.48 (0.70)     | 0.05                    | 0.86                   |                   |
| 7. I finish whatever I begin.                                                                       | 3.95 (0.84)     | 0.47                    | 0.63                   |                   |
| 8. I am diligent.                                                                                   | 4.33 (0.72)     | 0.17                    | 0.87                   |                   |
| Overall Perseverance of Effort mean                                                                 | 4.04 (0.59)     |                         |                        |                   |
| <b>Grit-S Overall (1-5)</b>                                                                         | 3.72 (0.59)     |                         |                        | 0.82              |

**Table 5. Associations of Performance Measures with CD-RISC 10 and Grit-S**

| Variable             | Metric (scale)                | CD-RISC 10 (0-40) |               |         | Grit-S (1-5) |             |         |
|----------------------|-------------------------------|-------------------|---------------|---------|--------------|-------------|---------|
|                      |                               | $\beta$           | 95% CI        | p-value | $\beta$      | 95% CI      | p-value |
| Medical Knowledge    | IM-ITE, percentile            | -0.34             | -0.62, -0.05  | 0.02    | 0.42         | -3.29, 4.12 | 0.83    |
| Professionalism      | Conference Attendance, number | -0.07             | -0.31, 0.18   | 0.59    | 2.70         | 0.11, 5.29  | 0.04    |
|                      | Evaluation Completion, %      | 0.19              | -0.05, 0.43   | 0.13    | 2.51         | 0.35, 4.67  | 0.02    |
| Clinical Performance | Faculty Evaluations (0-10)    | 0.0002            | -0.01, 0.01   | 0.98    | 0.06         | -0.08, 0.20 | 0.38    |
|                      | Peer Evaluations (0-10)       | 0.02              | -0.0006, 0.03 | 0.06    | 0.09         | -0.09, 0.26 | 0.33    |
|                      | Mini-CEX (0-10)               | -0.02             | -0.05, -0.002 | 0.03    | -0.20        | -0.47, 0.06 | 0.13    |
